23 **Abstract**

24 Recent population studies have significantly advanced our understanding of how age shapes  
25 the gut microbiota. However, the actual role of age could be inevitably confounded due to  
26 varying environmental factors in human populations. A well-controlled environment is thus  
27 necessary to reduce undesirable confounding effects, and recapitulate age-dependent  
28 taxonomic and functional changes in the healthy primate gut microbiota. Herein we  
29 performed 16S rRNA gene sequencing, characterized age-associated gut microbial profiles  
30 from infant to elderly crab-eating macaques reared in captivity, and systemically revealed  
31 lifelong dynamic changes of primate gut microbiota in the model. While the most  
32 significantly age-associated gut microbial taxa were mainly found in commensals such as  
33 *Faecalibacterium*, a set of suspicious pathogens such as *Helicobacter* were exclusively  
34 enriched in infants, pointing to their potential role in host development. Importantly, topology  
35 analysis indicated that the connectivity of gut microbial network was even more  
36 age-dependent than taxonomic diversity, with its tremendous decline probably linked to the  
37 host's healthy aging. NetShift analysis identified *Prevotella 9*, *Rikenellaceae RC9 gut group*  
38 and *Megasphaera* as key drivers during gut microbiota maturation and development, actively  
39 involved in age-dependent changes in phenotypes and functions of the gut microbial  
40 community. The current study demonstrates lifelong age-dependent changes in healthy  
41 primate gut microbiota. Our findings indicate potential importance of appropriate exposure to  
42 suspicious pathogens in infant development. The age-associated baseline profiles and driver  
43 microbes of primate gut microbiota in the current study could provide new insight into its  
44 role in the host's development and healthy aging.

45 **Keywords:** Age-dependent changes; non-human primates; healthy gut microbiota; network  
46 connectivity; driver microbes

## 47 **Introduction**

48 The human gut microbiota is composed of trillions of microbial cells that habitat in the  
49 gastrointestinal tract[1]. These microbes altogether encode an extremely large and dynamic  
50 genetic diversity, enabling the host to access additional energy and metabolites [2]. The gut  
51 microbiota thus plays a substantial role in human physiology and health [3]. In particular,  
52 commensal microbes in the gastrointestinal tract interplay with the host immune system,  
53 protect the host from pathogens, and modulate the host's physiological functions with  
54 commensal-derived metabolites [4-6].

55 The development of human gut microbiota, with dynamic changes after birth, have been  
56 implicated to play an active role concomitantly with the host's development and aging [7].  
57 After first colonization at birth, the postnatal gut microbiota develops rapidly in the first few  
58 months of life [8, 9]. By 1□ week of age, the infant gut microbiota has already become very  
59 similar to that at one-month old [10]. Breastfeeding is one of the key factors that greatly  
60 shape the infant gut microbiota, and is linked to the increase of *Bifidobacterium* species [11].  
61 Analysis of fecal bacteria in human populations shows that changes may occur in the gut  
62 microbiota as age increases, and could be associated with increased risk of disease, especially  
63 age-related diseases such as type 2 diabetes and hypertension in elderly people [7, 12-14].

64 Nevertheless, the actual effects of age on human gut microbiota remain to be further  
65 elucidated. The human gut microbial community is known to be highly dynamic. The existing  
66 population-based studies are inevitably influenced by a number of confounding factors in the  
67 populations. The individual human microbiota pattern is vastly variable. And varying  
68 environmental factors, such as diets [15] and antibiotic use [16] could dramatically influence  
69 the bacterial community [17]. In addition, people of different generations in the same  
70 population may have distinct growth experience and life styles due to the rapid urbanization  
71 of most human societies, which also shape the human gut microbiota [18]. These  
72 confounding factors emphasized the difficulty and importance to study healthy core native  
73 gut microbiota. A well-controlled model system that faithfully recapitulates age-dependent  
74 changes in the gut microbiota is thus needed, and would provide better understanding of the

75 role played by the gut microbiota in the host's healthy development and aging. In addition,  
76 humans have a much longer life span and evident difference in the gut microbiota compared  
77 to rodents, the lab animals the most widely used in existing gut microbiome studies[19]. In  
78 contrast, non-human primates (NHPs) have high similarities to humans in genetics,  
79 physiology as well as gut microbial compositions [20]. Moreover, NHPs in captivity have  
80 been found to have physiological characteristics and gut microbiota composition similar to  
81 those in humans [21]. Captive NHPs are reared with a formula diet and a stable environment,  
82 providing a feasible model to study age-dependent changes in the gut microbiota of humans  
83 and NHPs.

84 Various microbes in the gut microbiota interact to form a complex biological network.  
85 Therefore, not only taxonomic compositions, but also microbial interactions are essential to  
86 infer changes in microbial communities. In the current study, we conducted high-throughput  
87 sequencing of the 16S rRNA gene to analyze the fecal samples from captive infant, young  
88 adult, middle-aged, and elderly crab-eating macaques (*Macaca fascicularis*). Our results  
89 revealed compositional, functional and network topology changes of gut microbiota  
90 associated with its maturation and development. Moreover, our findings identified core  
91 age-associated microbes composed of not only commensals but also suspicious pathogens,  
92 implicating their importance in the host's development. We also provided novel evidence  
93 supporting a substantial role of driver microbes responsible for age-dependent changes in the  
94 gut microbiota network, which were further linked to altered functions of the microbial  
95 community. Such findings, taken together, could provide a baseline for better understanding  
96 of gut microbiota changes associated with the host's development and aging in health and  
97 diseases.

## 98 **Results**

### 99 *Age-dependent changes of microbiota diversity in healthy captive crab-eating macaques*

100 The metadata of 16s rRNA gene sequencing of fecal DNA was summarized in **Table S1**.

101 Rarefaction analysis of observed operational taxonomic units (OTUs) indicated that the  
102 sequencing efficiently captured the potential total OTUs in the fecal samples (**Fig. S1**). The  
103 top five phyla observed in the fecal samples of crab-eating macaques were Firmicutes  
104 (44.5%-61.1%), Bacteroidetes (26.4%-39.8%), Epsilonbacteraeota (2.3%-8.0%),  
105 Proteobacteria (1.9%-3.8%), and Spirochaetes (1.0%-2.7%) (**Fig. 1a**), with Firmicutes and  
106 Bacteroidetes as the two dominant phyla. Furthermore, compared to infants, the Firmicutes to  
107 Bacteroidetes (F/B) ratio was found significantly increased in adults (all  $P < 0.05$ ), especially  
108 in the middle-aged and elderly. (**Fig. 1b**). The F/B ratio was the lowest in infants (median =  
109 1.09), and increased in young adults (median = 1.28). The highest B/F ratio was observed in  
110 the middle-aged (median = 2.74), which slightly decreased in the elderly (median = 2.06)  
111 with no significant difference.

112 Comparison of metrics including the Shannon (**Fig. 1c**) index, Pielou's evenness,  
113 observed OTUs, phylogenetic diversity and Simpson index (**Fig. S2**), showed no significant  
114 change in alpha diversity among the age groups. In line with alpha diversity, the Venn  
115 diagram in **Fig. 1d** showed that 275 (94.18%) genera detected in more than six fecal samples  
116 were shared across different ages. As for beta diversity, principle coordination analysis  
117 (PCoA) based on the Bray-Curtis distance matrix showed that, the infant samples mainly  
118 clustered separately from the adult groups (**Fig. 1e**). The two older adult groups clustered  
119 together. The young adult samples fell in-between. Furthermore, permutational multivariate  
120 analysis of variance (PERMANOVA) results based on unweighted UniFrac distance indicated  
121 significant difference among the four age groups (**Fig. 1f**). The intergroup unweighted  
122 UniFrac distance between adults and infants showed a trend similar to the F/B ratio (median  
123 = 0.42, 0.47 and 0.46 in young, middle-aged and elderly adults respectively), compared to the  
124 intragroup distance in infants (median = 0.38). These results thus pointed to remarkable  
125 microbial community changes associated with age.

#### 126 *The top abundant gut microbial genera in the four age groups*

127 We then focused on the most abundant genera. Our results showed a trend of age-dependent

128 changes in top abundant genera, similar to that of the beta diversity. The heatmap in **Fig. 2a**  
129 showed the top 20 abundant genera from each of the age groups, which were mainly  
130 commensals (**Fig. 2b**). Half of these genera were shared by all age groups (**Fig. 2c**), including  
131 four genera from family Ruminococcaceae (*Ruminococcus 1*, *Ruminococcaceae UCG-005*,  
132 *Ruminococcaceae UCG-014*, and *Subdoligranulum*), three genera from family Prevotellaceae  
133 (*Prevotella 9*, *Prevotella 2*, and *Prevotellaceae UCG-003*), *Lactobacillus*, *Blautia*, and  
134 *Dialister*.

135 We also looked into *Bacteroides*, which had been reported to be abundant in gut  
136 microbiota of humans living in developed countries [22]. However, the genus show a low  
137 mean abundance less than 0.1% in our captive macaques (data not shown).

#### 138 *Correlation between differentially abundant gut microbes and age*

139 To further characterize age-associated gut microbes, we then identified OTUs with different  
140 abundance among age groups using STAMP (**Fig. S3 and S4**). The alluvial plots in **Fig. 3a**,  
141 **3b, 3c, 3d** and **3e** illustrated clear age-dependent shifts of these taxa at different phylogenetic  
142 levels. We further explored their correlation with age using Spearman correlation. At the  
143 phylum level (**Fig. 3e and S4**), *Epsilonbacteraeota*, *Deferribacteres*, *Fusobacteria*,  
144 *Bacteroidetes*, *Patescibacteria*, and *Cyanobacteria* were negatively associated with age,  
145 while *Actinobacteria*, *Kiritimatiellaeota*, *Lentisphaerae*, *Firmicutes*, *WPS-2*, *Spirochaetes*,  
146 *Planctomycetes*, *Euryarchaeota*, and *Tenericutes* were negatively associated with age. At the  
147 genus level, in total 115 genera were significantly associated with age, with 29 and 18 from  
148 family *Lachnospiraceae* and *Ruminococcaceae* respectively (**Fig. S6**). The top 40 genera  
149 with the strongest correlations with age were shown in **Fig. 3g**. Among these microbes, 23  
150 genera were negatively associated with age, most of which were potential commensals. These  
151 microbes includes night genera from family *Lachnospiraceae* (*Lachnospiraceae UCG-001*,  
152 *Lachnospiraceae UCG-003*, *Lachnospiraceae UCG-004*, *Lachnospiraceae UCG-008*,  
153 [*Eubacterium*] *ventriosum* group, *Fusicatenibacter*, *GCA-900066575*, [*Ruminococcus*]  
154 *torques* group, and *Roseburia*), two genera from family *Prevotellaceae* (*Alloprevotella* and

155 *Prevotella* 2), two genera from family *Ruminococcaceae* (*Faecalibacterium*, and  
156 *Fournierella*), *Actinobacillus*, *Campylobacter*, *Helicobacter*, *Mucispirillum*, *Veillonella*,  
157 *Cetobacterium*, *Brachyspira*, and *Gemella*. These top age-associated genera also included  
158 seventeen genera positively associated with age, including six from the *Ruminococcaceae*  
159 family (*Ruminococcaceae* UCG-002, *Ruminococcaceae* UCG-010, *Ruminococcaceae*  
160 UCG-013, *Ruminococcaceae* NK4A214, CAG-352, and [*Candidatus*] *Soleaferrea* group),  
161 *Treponema* 2, *Methanobrevibacter*, the *Rikenellaceae* RC9 gut group, *Christensenellaceae*  
162 R-7 group, [*Eubacterium*] *coprostanoligenes* group, *Lachnospiraceae* UCG-007,  
163 *Libanicoccus*, *Oscillibacter*, *Mogibacterium*, and *Stenotrophomonas*.

164 In addition, we also found significantly correlation of with age in lactic acid bacteria  
165 known as probiotics in humans (**Fig. S6**). *Bifidobacterium*, which is important in  
166 breastfeeding, and *Lactobacillus* that contains the largest number of widely used probiotics,  
167 both increased with age ( $r = 0.34$ ,  $P = 4.2 \times 10^{-4}$  and  $r = 0.29$ ,  $P = 0.0025$  respectively).

#### 168 *Differential taxa of gut microbiota enriched in the four age groups*

169 We then utilized LEfSe to identify differential taxa most enriched in each of the four age  
170 groups. At the phylum level, *Epsilonbacteraeota* and *Cyanobacteria* were enriched in infants,  
171 *Firmicutes*, *Actinobacteria*, and *Kiritimatiellaota* were enriched in the middle-aged, whereas  
172 *Proteobacteria* and *Euryarchaeota* were enriched in the elderly (**Fig 4a**). No phylum was  
173 enriched in young adults.

174 The largest numbers of enriched families and enriched genera were consistently found in  
175 infant macaques (**Fig. 4b**). The family most enriched in infants was *Lachnospiraceae*, and  
176 seven of the seventeen infant-enriched genera were from the family, including *Anaerostipes*,  
177 *Blautia*, *Dorea*, *Fusicatenibacter*, *Lachnospiraceae* UCG-001, *Lachnospiraceae* UCG-004,  
178 and *Roseburia*. *Helicobacter* was the most enriched genus in infants with family  
179 *Helicobacteraceae* also enriched in the same group (**Fig. 4c**). Other infant-enriched genera  
180 were mainly from family *Prevotellaceae* (*Alloprevotella*, *Prevotella* 2, and *Prevotellaceae*  
181 UCG-001) and family *Ruminococcaceae* (*Butyricicoccus*, *Faecalibacterium*, *Fournierella*,

182 *Ruminococcaceae* UCG-008, and *Subdoligranulum*). Other infant-enriched genera included  
183 *Holdemanella* from family *Erysipelotrichaceae*, *Phascolarctobacterium* from family  
184 *Acidaminococcaceae*, and *Sutterella* from *Burkholderiaceae*. In particular, family  
185 *Lactobacillaceae* and genus *Lactobacillus*, were uniquely enriched in young adults. It was  
186 noticed that *Bifidobacteriaceae*, another group of important lactic acid-producing bacteria  
187 were enriched in the middle-aged. Family *Spirochaetaceae* was the most enriched in the  
188 middle-aged. Seven genera were enriched in the middle-aged, including three genera from  
189 family *Ruminococcaceae* (*Ruminococcaceae* NK4A214 group, *Ruminococcaceae* UCG-002,  
190 and *Ruminococcaceae* UCG-010)), *Treponema* 2 from family *Spirochaetaceae*,  
191 *Rikenellaceae* RC9 gut group, *Christensenellaceae* R-7 group, and *Lachnospiraceae* FCS020  
192 group. In the elderly the most enriched family was *Succinivibrionaceae*. Six genera were  
193 enriched in the elderly including *Prevotellaceae* UCG\_003, *Ruminococcaceae* UCG-013,  
194 *Megasphaera* from family *Veillonellaceae*, *Coprococcus* 3 from family *Lachnospiraceae*, and  
195 *Desulfovibrio* from *Desulfovibrionaceae*.

#### 196 *Age-dependent gut microbiota networks and key driver genera*

197 We then further used the Sparse Compositional Correlation (SparCC) analysis to explore the  
198 interaction among gut microbes in the four age groups (**Fig. 5**). All genera with relative  
199 abundance  $\geq 0.1\%$  were included in the networks. Surprisingly, although not preferentially  
200 selected, the age-associated genera were found to be the major components of these networks.  
201 The gut microbiota network in infants had the lowest connectivity of interactive in infants, as  
202 indicated by small Maximal Clique Centrality (MCC) scores (total MCC score = 56) (**Fig. 5a**  
203 **and 6a**). The network developed into a more mature stage in young adults (total MCC score  
204 = 274) (**Fig. 5b and 6a**), and had the highest connectivity in the middle-aged (total MCC  
205 score = 3688) (**Fig. 5c and 6a**). Unexpectedly, although similar gut microbiota diversities  
206 were found between the elderly and middle-aged, the network connectivity dramatically  
207 decreased in the elderly (total MCC score = 83) (**Fig. 5d and 6a**).

208 We then utilized cytoHubba to analyze hub genera, which were supposed to identified



209 by ranking their centralities MCC and EcCentricity (EPC) scores. Among the hub genera  
210 shown in **Fig. 6a**, *Prevotella 9* was the only one shared by all four age groups as well as the  
211 network constructed using all samples (**Fig. 6a and 6b**). The inter-genera interactions  
212 mediated by *Prevotella 9* could be of potential importance. The strongest positive interactions  
213 in the microbial communities were found in *Prevotella 2* and *Alloprevotella* with *Prevotella 9*  
214 in infants. In addition to *Prevotella 9*, *Helicobacter* and *Prevotella 2* were another two  
215 important hub genera in infants. The role of such interactions mediated by these genera, in  
216 particular *Prevotella 9*, gradually diminished with age, and were in part replaced by  
217 interactions mediated by hub genera negatively associated with age, such as  
218 *Ruminococcaceae UCG-002* and *Rikenellaceae RC9 gut group*.

219 Moreover, we used NetShift analysis to detect rewiring between microbiota networks,  
220 and identified key driver microbes responsible for the changes (**Fig. 6c and Table. S3**).  
221 *Prevotella 9* was found to be the only driver genus responsible for the microbial changes  
222 between infants and young adults. Novel interactions with *Prevotella 9* were established in  
223 the gut microbiota of young adults compared to that of infants. As for adults, multiple  
224 potential drivers were identified. Among these drivers, *Rikenellaceae RC9 gut group* and  
225 *Megasphaera* are the two key driver genera that contribute to the long-term development of  
226 gut microbiota in adults. Another five genera including *Dialister*, *Christensenellaceae R-7*  
227 *group*, *[Eubacterium] coprostanoligenes group*, *Ruminococcaceae UCG-005* and  
228 *Ruminococcaceae UCG-002 group* are involved in the change of gut microbiota between  
229 young adults and the middle-aged. Another five genera including *Ruminococcaceae*  
230 *UCG-014*, *Holdemanella*, *Succinivibrio*, *Alloprevotella*, *Lachnospiraceae UCG-007*, and  
231 *Prevotella 2* are involved in the change of gut microbiota between the middle-aged and the  
232 elderly.

233 *Age-associated microbial phenotypes and functions and their correlations with gut*  
234 *microbiota*

235 To understand the potential function impact of age-dependent taxonomic changes in gut

236 microbiota, the microbial phenotypes were predicted using BugBase and compared among  
237 age groups. Anaerobic and Gram-positive phenotypes was significantly up-regulated,  
238 whereas facultative anaerobic and Gram-negative phenotypes were down-regulated in the  
239 middle-aged and elderly groups compared to infants (all  $P < 0.01$ ) (**Fig. 7a**). In line with  
240 these findings, Spearman correlation analysis showed that, the anaerobic and Gram-negative  
241 phenotypes significantly decreased ( $r = -0.37$ ,  $P = 1.2 \times 10^{-4}$  and  $r = -0.34$ ,  $P = 4.3 \times 10^{-4}$   
242 respectively) with age, whereas the facultative anaerobic and Gram-positive phenotypes  
243 significantly increased with age ( $r = 0.42$ ,  $P = 8.7 \times 10^{-6}$  and  $r = 0.34$ ,  $P = 4.3 \times 10^{-4}$   
244 respectively) (**Fig S6**).

245 We also determined age-dependent changes in gut microbial function using the software  
246 Phylogenetic Investigation of Communities by Reconstruction of Unobserved States  
247 (PICRUST), and identified 152 Kyoto Encyclopedia of Genes and Genomes (KEGG) modules  
248 to be significantly associated with age (**Table. S2**). The principle component analysis (PCA)  
249 plot derived from the abundance of KEGG modules revealed remarkable differences in  
250 microbial functions among age groups, showing a similar pattern with beta diversity (**Fig. 7b**).  
251 We observed significant correlation between these microbial functions and age. As shown in  
252 the heatmap in **Fig. 7c**, metabolic pathways that were the most positively associated with age  
253 were mainly involved in biosynthesis and metabolism of lipids, carbohydrates and amino  
254 acids. And metabolic pathways that were the most negatively associated with age were  
255 mainly involved in host immune response and biosynthesis of the immunomodulating  
256 metabolite lipopolysaccharides (LPS), which are endotoxin derived from the outer membrane  
257 of Gram-negative bacteria. LEfSe analysis further showed that the pathways related to  
258 Porphyrin and chlorophyll metabolism, oxidative phosphorylation and biosynthesis of LPS  
259 were upregulated in infants (**Fig. 7d**). In contrast, biosynthesis of peptidoglycan, another  
260 important immunomodulating metabolite mainly derived from Gram-positive bacteria, was  
261 increased in young adults. Metabolism of carbohydrates was most upregulated in the  
262 middle-aged and elderly. Noteworthy, strong correlations were found between these  
263 age-associated microbial functions and gut microbes, in particular the hub genera and drivers

264 (Fig. S8), with the largest number of positive correlations found in *Prevotella 9*.

## 265 Discussion

266 By using the NHP model of captive crab-eating macaques, we revealed remarkable lifelong  
267 age-dependent changes in gut microbial composition and functions. Moreover, our study  
268 identified hub and driver microbes that holds a potential significance in the age-dependent  
269 microbial interplay. Given the similarities between the captive crab-eating and humans, these  
270 findings could provide better understanding of age-dependent changes in the human gut  
271 microbiota.

272 The gut microbiota of captive macaques in this study showed similarities to that of  
273 humans, especially those in developing countries [12, 21, 23, 24]. In line with human and  
274 other NHPs, the gut microbiota of our captive crab-eating macaques was dominated by  
275 Firmicutes and Bacteroidetes across all ages (Fig. 1a) [1, 25]. Most of the common genera  
276 with high abundance across all ages, are potentially commensals from the Ruminococcaceae  
277 and Prevotellaceae families such as *Prevotella 9* (Fig. 2b). In contrast, *Bacteroides* had very  
278 low abundance. Gut microbial communities of individuals from developing countries has  
279 been reported to be dominated by *Prevotella*[24], while those from developed countries was  
280 highly abundant in *Bacteroides*[26]. Plant-based diets with low fat could be involved in the  
281 higher similarities between the gut microbiota of and captive macaques and humans living in  
282 developing countries [22].

283 The lack of significant change in alpha diversity might indicate the important of  
284 microbiota studies in captive NHPs (Fig. 1). Yatsunenکو *et al.* reported that observed OTUs  
285 increased with age in gut microbiota of all three populations [12]. In a recent gut microbiota  
286 study of non-captive rhesus macaques Chen *et al.* reported that male adults had significant  
287 higher Shannon index than male juvenile [27]. However, under a well-controlled environment  
288 provided by captivity, alpha diversity changes are probably smoothed out. By age of 1-2  
289 years old, infant gut microbiota had gained more than 94% of OTUs observed in adults (Fig  
290 2a). Age-related factors, such as diets and life styles, rather than age itself, might actually

291 contribute to the age-associated increase of alpha diversity in human populations.

292       Nevertheless, the remarkable age-dependent changes including the F/B ratio and beta  
293 diversity as well as network topology emphasized actual effects of age on the gut microbiota  
294 in captive macaques (**Fig. 1b**). The F/B ratio is considered as an indicator of maturation and  
295 development of gut microbiota [28], and has been reported to be involved in health-related  
296 conditions or diseases such as obesity [29]. In the current study the F/B ratio increased in  
297 adult macaques, and decreased in elderly macaques (**Fig. 1b**), resembling observation in  
298 humans [28, 30]. It could be due to increased Firmicutes and decreased Bacteroidetes with  
299 age (**Fig. 3f**). Interestingly, although middle-aged and elderly macaques had similar beta  
300 diversity, evident reduction of connectivity in elderly macaques, indicating a decline of  
301 microbial interactions. Such findings suggest that, network connectivity could be more  
302 sensitive than the F/B ratio and biological diversity to detect age-dependent changes in the  
303 gut microbiota.

304       Moreover, the age-associated microbes identified in captive macaques could be involved  
305 in the host's development and aging in good health (**Fig. 3 and 4**). These microbes could play  
306 distinct roles dependent of their direction of age-correlation. A large proportion of these  
307 age-associated genera decreased with age, including those enriched in infants. The  
308 composition and activities in the infant gut microbiota has been engaged in the host's early  
309 development and a variety of diseases, such as allergy and autisms [5, 31, 32]. These genera  
310 negatively associated with age in fact consisted of at least two distinct groups. First, these  
311 genera contained potential commensals, which were active players in the early development  
312 of gut microbiota (**Fig. 4b, S4, and S6**). The interplay between these commensals and the  
313 host intestinal barriers are important to the postnatal development of host metabolism,  
314 immunity and mucosal barrier [33-35]. Commensals could benefit the host by producing  
315 metabolites such as short chain fatty acids [36]. A number of the age-associated commensals  
316 in the current study are butyrate-producing bacteria in the host colon, including  
317 *Faecalibacterium*, *Roseburia*, *Anaerostipes*, and *Butyricoccus* [37]. These commensals  
318 include anti-inflammatory bacteria, and outcompete pathogens to protect the host, and

319 abnormal alteration of them has been reported in various human diseases [38-42]. For  
320 example, *Faecalibacterium prausnitzii* is one of the most abundant anti-inflammatory  
321 commensal bacteria in the colon, and was reduced in Crohn disease patients [40].

322         Second, these bacteria negative associated with age also contained a number of  
323 suspicious pathogens, especially enteropathogens (**Fig. 4b, S4, and S6**). *Campylobacter* and  
324 *Actinobacillus* are causes of infectious diseases in humans, *Campylobacteriosis* and  
325 *Actinobacillosis* [43]. Species from the genus *Brachyspira* are known pathogens causing  
326 diarrhea in animals and human [44]. Bacteria from the *Gemella* genus are involved in  
327 endocarditis [45]. *Anaerobiospirillum succiniciproducens* from the genus *Anaerobiospirillum*  
328 has been found to be associated with has diarrhea and bacteremia [45]. It was noted that  
329 *Helicobacter*, a group of Gram-negative bacteria, was identified as a hub genus with high  
330 abundance in infant gut microbiota, but its role remained largely unclear. *Helicobacter*  
331 *macacae* from the genus have been reported to be frequently detected in rhesus monkeys  
332 without a diarrheal history [46] . Rhoades et al. report that 8-month infant remained  
333 asymptomatic for diarrhea were enriched for the species [9]. In line with these findings,  
334 biosynthesis of LPS was also upregulated in our infant macaques (**Fig.7**), further supporting a  
335 potential role of these age-associated microbes in modulation of the host's immunity. It  
336 should be taken into account that all macaques in the current study were in good health.  
337 Therefore, the gradual decrease of these suspicious pathogens with age might associated with  
338 the maturation of gut mucosal barrier. In addition, recent studies have reported possible  
339 effects of pathogens protecting the host against allergic sensitization [47, 48]. In our captive  
340 macaques the suspicious pathogens with their abundance under control might allow "good"  
341 exposure for the proper training of the host's immune system.

342         While the roles of the microbes positively associated with age remained largely unclear,  
343 they could be related to the host's healthy aging (**Fig. 4b, S4, and S6**). A subset of these  
344 microbes has been implicated to be involved in metabolism of nutrients including lipids and  
345 carbohydrates, which are in line with the predicted gut microbial functions upregulated with  
346 age in our macaques. Importantly, the genus *Lactobacillus*, highly abundant in our adult

347 macaques (**Fig. 2**), are widely used probiotics with potential effects on lipid metabolism [49].  
348 We also notice that *Bifidobacterium*, the key probiotics for the metabolism of  
349 oligosaccharides in breast milk [50], also increased with age. The increase of these lactic  
350 acid-producing probiotics might indicate a potential role of these bacteria in healthy aging. In  
351 addition, *Eubacterium coprostanoligenes* had been identified as a cholesterol-reducing  
352 anaerobe [51]. genera *Christensenellaceae R-7 group*, *Ruminococcaceae (UCG-002*, and  
353 *UCG-010)*, and *Lachnospiraceae FCS020 group* were linked to circulating lipid-related  
354 metabolites in a recent population-based study[52]. *Candidatus soleaferrea* was increased in  
355 a randomized controlled trial of hypocaloric diet with Hass avocado [53]. In line with these  
356 findings, changes of microbial functions related to metabolisms of lipids and carbohydrates  
357 increased with age (**Fig. 7b**). In addition, these microbes positively associated with age are  
358 also involved in diseases. *Treponema 2*, *Rikenellaceae RC9 gut group*, *Prevotellaceae*  
359 *UCG-003* were increased in rats with isoproterenol-induced acute myocardial ischemia[54],  
360 whereas in a meta-analysis *Christensenellaceae R-7 group* was found to be reduced in  
361 patients affected by intestinal diseases [55]. Intriguingly, although the reported role of  
362 archaea in the host's health remain unclear, our results showed that, the archaeal family  
363 *Methanobacteriaceae* was differentially enriched in elderly macaques, and genus  
364 *Methanobrevibacter* increased with age in the macaque gut microbiota. Such findings thus  
365 indicate a positive association of these methanogens with host aging.

366 This study further highlights the pivotal role of driver microbes in age-dependent  
367 changes of the gut microbiota (**Fig. 5 and 6**). Genus *Prevotella 9*, with a high abundance in  
368 our captive macaques, was identified as the most important hub mediating large proportion of  
369 microbial interactions in gut microbiotas across all ages. And it acted as the key driver  
370 responsible for the gut microbiota maturation from infants to young adults. The exact  
371 biological significance of *Prevotella 9* in the context of integrative bacterial community and  
372 microbiota development has yet to be further elucidated. A recent reanalysis of existing gut  
373 metagenomes from NHPs and humans reported that *Prevotella* were prevalent in primate gut  
374 microbiota of different host species [20]. In line with such finding, the *Prevotella 9* genus

375 was highly abundant across all ages with gradual age-dependent decrease in our captive  
376 macaques. The high abundance of the genus in primates could be strongly associated with  
377 plant-based, low-fat diets [22]. In addition, the high abundance of *Prevotella* in humans and  
378 NHPs might also have possible implications for host-microbiota coevolution [56]. Although  
379 *Prevotella* remained abundant in adult macaques, its level decreased with age, and possibly  
380 freed up space for other microbes that were necessary for further microbiota development,  
381 such as *Rikenellaceae RC9 gut group* and *Megasphaera*. Such shift of driver microbes could  
382 in turn impact the changes of gut microbiota phenotypes and functions.

### 383 **Conclusions**

384 In summary, by using captive crab-eating macaques to control confounding factors, the  
385 current study demonstrates evident age-dependent structural and functional changes in the  
386 healthy gut microbiota during the host's development and aging. Our key findings of  
387 age-associated microbes, composed of both commensals and suspicious pathogens, indicate  
388 the potential importance of appropriate bacterial exposure for the early development of the  
389 host. Moreover, the hub and driver microbes identified by network topology analysis  
390 probably play a pivotal role as core microbes in the microbial communities, and are  
391 responsible for the maturation and development of the primate gut microbiota. By  
392 characterizing the age-dependent changes in the gut microbiota during the host's  
393 development and healthy aging, the current study also provides a baseline for comparison and  
394 understanding of the role of the primate gut microbiota in health and disease.

### 395 **Materials and methods**

#### 396 *Animals in the study*

397 A total of 104 male crab-eating macaques from Guangdong Xiangguan Biotechnology Co.  
398 Ltd. (Guangzhou, China) were included in the current study. All of the animals were  
399 confirmed to be in good health by records and veterinary examination prior to the study.  
400 These animals were composed of four different age-groups (N=26 for each group), including

401 infant (1-2 years old), young adult (4-6 years old), middle-aged group (8-10 years old), and  
402 an elderly macaques ( $\geq 13$  years old). Post-weaning infant macaques were selected to reduce  
403 possible effects of breastfeeding. All animals were kept in a well-controlled environment with  
404 moderate room temperature (16-28 °C) and relative humidity of 40%-70%, as well as a  
405 12/12-hour light-dark cycle. The study complied with protocols approved by the Animal  
406 Ethics Committees of Guangdong Institute of Applied Biological Resources, and were in  
407 compliance with the Guide for the Care and Use of Laboratory Animals [57].

#### 408 *Stool sample collection and DNA extraction*

409 Rectal swab samples were freshly collected from each monkey, and stored at -80 °C  
410 immediately until DNA extraction. Microbial DNA was extracted using TIANamp Stool  
411 DNA kit (Cat.#DP328, Tiangen, China) according to the manufacturer's instructions, and its  
412 concentration and quality were assessed using a Nanodrop One Microvolume UV  
413 Spectrophotometer (ThermoFisher, U.S.) .

#### 414 *16S rRNA gene sequencing*

415 The hypervariable V4 regions of bacterial/archaeal 16s rRNA genes were amplified using  
416 polymerase chain reaction and V4-specific primers 515F  
417 (5'-GTGCCAGCMGCCGCGGTAA-3') and 806R (5'-GGACTACHVGGGTWTCTAAT-3').  
418 PCR products between 400 and 450 bp were checked using the 2% agarose gel, purified  
419 using GeneJET Gel Extraction Kit (Thermo Fisher Scientific, USA), and sequenced on an Ion  
420 S5XL sequencer with a single-end 400-bp read length configuration.

#### 421 *Processing of 16S rRNA gene sequencing data*

422 Bioinformatic analysis of the 16S rRNA gene sequencing data was performed using the  
423 QIIME2 (version 2018.6.0) analysis pipeline [58]. Briefly, sequencing data were processed  
424 by the dada2 program to filter low-quality and chimeric sequences, and generate unique  
425 feature tables equivalent to OTU tables at exact match or 100% sequence similarity.



426 Taxonomy was then assigned to these features using the q2-feature-classifier against the  
427 full-length SILVA database (release r132) at 99% similarity cutoff [59]. Analysis of  
428 microbiota diversities were conducted in QIIME2: alpha diversity metrics including Pielou's  
429 evenness, phylogenetic diversity, observed OTUs, Shannon and Simpson's indices, and beta  
430 diversity including weighted/unweighted UniFrac distances, and Bray-Curtis dissimilarity.  
431 Comparison of beta diversity was performed using the nonparametric method PERMANOVA.  
432 Abundance of OUTs were compared among groups by using STAMP [59]. the Linear  
433 discriminant analysis (LDA) Effect Size (LEfSe) algorithm was used with a log (LDA) score  
434 cutoff of 2 to identify taxa specifically enriched in particular age groups [60]. Phylogenetic  
435 cladograms of LEfSe results were visualized using the GraPhlAn tool  
436 (<https://bitbucket.org/nsegata/graphlan>).

#### 437 *Microbial interactive network construction and analysis*

438 The SparCC (<https://bitbucket.org/yonatanf/sparcc>) algorithm was used to estimate the  
439 correlations among gut microbes [61]. 100 bootstrap replicates were used to calculate the  
440 pseudo  $P$ -values in the SparCC analysis, and correlations with  $|$  correlation coefficient ( $r$ )  
441  $| > 0.2$  and  $P < 0.01$  were considered significant. For each OTU with significant SparCC  
442 correlation, a weighted node connectivity score was calculated as an indicator of its weight in  
443 the network, by summing up its  $| r |$  with all of its first neighbors [62]. The constructed gut  
444 microbial interactive network was further visualized using Cytoscape version 3.7.0 [63]. The  
445 cytoHubba plugin was used to identify hub genera in the networks [64]. Two node ranking  
446 methods including a local-based method MCC and a global-based method EPC were used to  
447 evaluate importance of genera. In addition, NetShift (<https://web.rniapps.net/netshift/>) was  
448 used to evaluate potential driver microbes using a case-control strategy to compare a pair of  
449 networks as described [64, 65]. Neighbor Shift (NESH) Scores were calculated to quantify  
450 enriched interaction in the case over the control.

451 *Prediction of microbial phenotypes and function profiles*

452 The BugBase (<https://bugbase.cs.umn.edu/>) analysis tool was utilized to predict high-level  
453 phenotypes in fecal microbiome samples. PICRUSt version 1.1.4 was used to predict  
454 microbial functions from the 16S rRNA gene sequencing data, which were further  
455 categorized using the BRITE hierarchy of the KEGG database [66]. PCA based on KEGG  
456 module abundance was conducted using STAMP.

457 *Statistical analysis*

458 Statistical analysis was performed using GraphPad Prism V.7.0a (GraphPad Software, USA)  
459 and the R statistical language (version 3.6.0). Abundance of OTUs and KEGG modules  
460 among groups were compared using the non-parametric Kruskal-Wallis test, and evaluated  
461 for pair-wise inter-group differences with Tukey's post hoc test if overall significance was  
462 found. The Benjamini-Hochberg false discovery rate (FDR) correction was applied for  
463 multiple testing. Correlations of OTUs, microbial phenotypes and KEGG functions with age  
464 were determined using Spearman's correlation analysis. Differences in the taxa were analyzed  
465 by LEfSe with default settings.

466

467 **Ethics approval and consent to participate**

468 The study complied with protocols approved by the Animal Ethics Committees of  
469 Guangdong Institute of Applied Biological Resources, and were in compliance with the  
470 Guide for the Care and Use of Laboratory Animals.

471 **Consent for publication**

472 Not applicable.

473 **Data availability**

474 The raw datasets of 16s rRNA gene amplicon sequencing in the current study are deposited  
475 and available in the BioProject (<https://www.ncbi.nlm.nih.gov/bioproject>) repository under  
476 the accession number PRJNA598010.

477 **Competing interests**

478 The authors declare that they have no competing interests.

479 **Funding**

480 This study was supported in part by research grants from GDAS special project of Science  
481 and Technology Development(2019GDASYL-0302007), National Natural Science  
482 Foundation of China (No. 31671311 and 81170853), Guangdong Science &Technology  
483 Project (2017A070702014, 2014B070706020), the National Key R&D Program of China  
484 (2018YFA0901700), the National first-class discipline program of Light Industry Technology  
485 and Engineering (No. LITE2018-14), the “Six Talent Peak” Plan of Jiangsu Province (No.  
486 SWYY-127), Natural Science Foundation of Guangdong Province (No. 2019A1515012062),  
487 GDAS Special Project of Science and Technology Development(2018GDASCX-0107),  
488 GDAS Special Project of Science and Technology Development(2017GDASCX-0107), the  
489 Fundamental Research Funds for the Central Universities (JUSRP51712B and  
490 JUSRP1901XNC), the Taihu Lake Talent Plan, the Program for High-Level Entrepreneurial  
491 and Innovative Talents Introduction of Jiangsu Province, Guangdong High-level Personnel of  
492 Special Support Program, Yangfan Plan of Talents Recruitment Grant

493 **Authors' contributions**

494 Z-YW and J-HR contributed equally to this work. J-HR and J-HC conceived the project and  
495 planned the experiments. J-HR, B-HL and M-TT collected the fecal samples. Z-YW, M-TT,  
496 G-AZ, Q-CL, L-MW, B-QX performed the experiments. Z-YW, G-AZ, X-YL and J-HC  
497 analyzed and interpreted the experiment data. Z-YW, X-YL and J-HC drafted the manuscript.

498 All authors read and approved the final manuscript.

499 **Acknowledgement**

500 Not applicable.

501

502 **References**

503 [1] Turnbaugh PJ, Ley RE, Hamady M, Fraser-Liggett CM, Knight R, Gordon JI. The human microbiome  
504 project. *Nature* 2007;449:804-10.

505 [2] Gill SR, Pop M, Deboy RT, Eckburg PB, Turnbaugh PJ, Samuel BS, et al. Metagenomic analysis of the  
506 human distal gut microbiome. *Science* 2006;312:1355-9.

507 [3] Shreiner AB, Kao JY, Young VB. The gut microbiome in health and in disease. *Curr Opin Gastroenterol*  
508 2015;31:69-75.

509 [4] Rehman T. Role of the Gut Microbiota in Age-Related Chronic Inflammation. *Endocrine, Metabolic &*  
510 *Immune Disorders-Drug Targets* 2012;12:361-7.

511 [5] Buford TW. (Dis)Trust your gut: the gut microbiome in age-related inflammation, health, and disease.  
512 *Microbiome* 2017;5:80.

513 [6] Arpaia N, Campbell C, Fan X, Dikiy S, van der Veeken J, deRoos P, et al. Metabolites produced by  
514 commensal bacteria promote peripheral regulatory T-cell generation. *Nature* 2013;504:451-5.

515 [7] O'Toole PW, Jeffery IB. Gut microbiota and aging. *Science* 2015;350:1214-5.

516 [8] Milani C, Duranti S, Bottacini F, Casey E, Turrone F, Mahony J, et al. The First Microbial Colonizers of the  
517 Human Gut: Composition, Activities, and Health Implications of the Infant Gut Microbiota. *Microbiol Mol Biol*  
518 *Rev* 2017;81.

519 [9] Rhoades N, Barr T, Hendrickson S, Prongay K, Haertel A, Gill L, et al. Maturation of the infant rhesus  
520 macaque gut microbiome and its role in the development of diarrheal disease. *Genome Biology* 2019;20:173.

521 [10] Hill CJ, Lynch DB, Murphy K, Ulaszewska M, Jeffery IB, O'Shea CA, et al. Evolution of gut microbiota  
522 composition from birth to 24 weeks in the INFANTMET Cohort. *Microbiome* 2017;5:4.

523 [11] Garrido D, Ruiz-Moyano S, Jimenez-Espinoza R, Eom HJ, Block DE, Mills DA. Utilization of

- 524 galactooligosaccharides by *Bifidobacterium longum* subsp. *infantis* isolates. *Food Microbiol* 2013;33:262-70.
- 525 [12] Yatsunenko T, Rey FE, Manary MJ, Trehan I, Dominguez-Bello MG, Contreras M, et al. Human gut  
526 microbiome viewed across age and geography. *Nature* 2012;486:222-7.
- 527 [13] Li J, Zhao F, Wang Y, Chen J, Tao J, Tian G, et al. Gut microbiota dysbiosis contributes to the development  
528 of hypertension. *Microbiome* 2017;5:14.
- 529 [14] Qin J, Li Y, Cai Z, Li S, Zhu J, Zhang F, et al. A metagenome-wide association study of gut microbiota in  
530 type 2 diabetes. *Nature* 2012;490:55-60.
- 531 [15] David LA, Maurice CF, Carmody RN, Gootenberg DB, Button JE, Wolfe BE, et al. Diet rapidly and  
532 reproducibly alters the human gut microbiome. *Nature* 2014;505:559-63.
- 533 [16] Perez-Cobas AE, Gosalbes MJ, Friedrichs A, Knecht H, Artacho A, Eismann K, et al. Gut microbiota  
534 disturbance during antibiotic therapy: a multi-omic approach. *Gut* 2013;62:1591-601.
- 535 [17] Rinninella E, Raoul P, Cintoni M, Franceschi F, Miggiiano GAD, Gasbarrini A, et al. What is the Healthy  
536 Gut Microbiota Composition? A Changing Ecosystem across Age, Environment, Diet, and Diseases.  
537 *Microorganisms* 2019;7.
- 538 [18] Dominguez-Bello MG, Godoy-Vitorino F, Knight R, Blaser MJ. Role of the microbiome in human  
539 development. *Gut* 2019;68:1108-14.
- 540 [19] Walter J, Armet AM, Finlay BB, Shanahan F. Establishing or Exaggerating Causality for the Gut  
541 Microbiome: Lessons from Human Microbiota-Associated Rodents. *Cell* 2020;180:221-32.
- 542 [20] Manara S, Asnicar F, Beghini F, Bazzani D, Cumbo F, Zolfo M, et al. Microbial genomes from non-human  
543 primate gut metagenomes expand the primate-associated bacterial tree of life with over 1000 novel species.  
544 *Genome Biol* 2019;20:299.
- 545 [21] Clayton JB, Vangay P, Huang H, Ward T, Hillmann BM, Al-Ghalith GA, et al. Captivity humanizes the  
546 primate microbiome. *Proc Natl Acad Sci U S A* 2016;113:10376-81.
- 547 [22] Ou J, Carbonero F, Zoetendal EG, DeLany JP, Wang M, Newton K, et al. Diet, microbiota, and microbial  
548 metabolites in colon cancer risk in rural Africans and African Americans. *Am J Clin Nutr* 2013;98:111-20.
- 549 [23] Yasuda K, Oh K, Ren B, Tickle TL, Franzosa EA, Wachtman LM, et al. Biogeography of the intestinal  
550 mucosal and luminal microbiome in the rhesus macaque. *Cell Host Microbe* 2015;17:385-91.
- 551 [24] Lin A, Bik EM, Costello EK, Dethlefsen L, Haque R, Relman DA, et al. Distinct distal gut microbiome

- 552 diversity and composition in healthy children from Bangladesh and the United States. *PLoS One*  
553 2013;8:e53838.
- 554 [25] Mahowald MA, Rey FE, Seedorf H, Turnbaugh PJ, Fulton RS, Wollam A, et al. Characterizing a model  
555 human gut microbiota composed of members of its two dominant bacterial phyla. *Proc Natl Acad Sci U S A*  
556 2009;106:5859-64.
- 557 [26] Yatsunenko T, Rey FE, Manary MJ, Trehan I, Dominguez-Bello MG, Contreras M, et al. Human gut  
558 microbiome viewed across age and geography. *Nature* 2012;486:222-7.
- 559 [27] Chen Z, Yeoh YK, Hui M, Wong PY, Chan MCW, Ip M, et al. Diversity of macaque microbiota compared  
560 to the human counterparts. *Sci Rep* 2018;8:15573.
- 561 [28] Mariat D, Firmesse O, Levenez F, Guimaraes V, Sokol H, Dore J, et al. The Firmicutes/Bacteroidetes ratio  
562 of the human microbiota changes with age. *BMC Microbiol* 2009;9:123.
- 563 [29] Koliada A, Syzenko G, Moseiko V, Budovska L, Puchkov K, Perederiy V, et al. Association between body  
564 mass index and Firmicutes/Bacteroidetes ratio in an adult Ukrainian population. *BMC Microbiol* 2017;17:120.
- 565 [30] Claesson MJ, Cusack S, O'Sullivan O, Greene-Diniz R, de Weerd H, Flannery E, et al. Composition,  
566 variability, and temporal stability of the intestinal microbiota of the elderly. *Proc Natl Acad Sci U S A* 2011;108  
567 Suppl 1:4586-91.
- 568 [31] Rodríguez JM, Murphy K, Stanton C, Ross RP, Kober OI, Juge N, et al. The composition of the gut  
569 microbiota throughout life, with an emphasis on early life. *Microbial Ecology in Health & Disease* 2015;26.
- 570 [32] Sharon G, Cruz NJ, Kang DW, Gandal MJ, Wang B, Kim YM, et al. Human Gut Microbiota from Autism  
571 Spectrum Disorder Promote Behavioral Symptoms in Mice. *Cell* 2019;177:1600-18 e17.
- 572 [33] Tlaskalova-Hogenova H, Stepankova R, Kozakova H, Hudcovic T, Vannucci L, Tuckova L, et al. The role  
573 of gut microbiota (commensal bacteria) and the mucosal barrier in the pathogenesis of inflammatory and  
574 autoimmune diseases and cancer: contribution of germ-free and gnotobiotic animal models of human diseases.  
575 *Cell Mol Immunol* 2011;8:110-20.
- 576 [34] Lopez-Siles M, Duncan SH, Garcia-Gil LJ, Martinez-Medina M. *Faecalibacterium prausnitzii*: from  
577 microbiology to diagnostics and prognostics. *ISME J* 2017;11:841-52.
- 578 [35] Hsiao A, Ahmed AM, Subramanian S, Griffin NW, Drewry LL, Petri WA, Jr., et al. Members of the human  
579 gut microbiota involved in recovery from *Vibrio cholerae* infection. *Nature* 2014;515:423-6.

- 580 [36] Martin R, Miquel S, Ulmer J, Kechaou N, Langella P, Bermudez-Humaran LG. Role of commensal and  
581 probiotic bacteria in human health: a focus on inflammatory bowel disease. *Microb Cell Fact* 2013;12:71.
- 582 [37] Riviere A, Selak M, Lantin D, Leroy F, De Vuyst L. Bifidobacteria and Butyrate-Producing Colon Bacteria:  
583 Importance and Strategies for Their Stimulation in the Human Gut. *Front Microbiol* 2016;7:979.
- 584 [38] Abt MC, Pamer EG. Commensal bacteria mediated defenses against pathogens. *Curr Opin Immunol*  
585 2014;29:16-22.
- 586 [39] Herp S, Brugiroux S, Garzetti D, Ring D, Jochum LM, Beutler M, et al. *Mucispirillum schaedleri*  
587 Antagonizes Salmonella Virulence to Protect Mice against Colitis. *Cell Host & Microbe* 2019;25:681-94.e8.
- 588 [40] Munukka E, Rintala A, Toivonen R, Nylund M, Yang B, Takanen A, et al. *Faecalibacterium prausnitzii*  
589 treatment improves hepatic health and reduces adipose tissue inflammation in high-fat fed mice. *The ISME*  
590 *Journal* 2017;11:1667-79.
- 591 [41] Jenq RR, Taur Y, Devlin SM, Ponce DM, Goldberg JD, Ahr KF, et al. Intestinal *Blautia* Is Associated with  
592 Reduced Death from Graft-versus-Host Disease. *Biol Blood Marrow Transplant* 2015;21:1373-83.
- 593 [42] Eeckhaut V, Machiels K, Perrier C, Romero C, Maes S, Flahou B, et al. *Butyricicoccus pullicaecorum* in  
594 inflammatory bowel disease. *Gut* 2013;62:1745-52.
- 595 [43] Coker AO, Isokpehi RD, Thomas BN, Amisu KO, Obi CL. Human *Campylobacteriosis* in Developing  
596 Countries1. *Emerging Infectious Diseases* 2002;8:237-43.
- 597 [44] Mirajkar NS, Phillips ND, La T, Hampson DJ, Gebhart CJ. Characterization and Recognition of  
598 *Brachyspira hampsonii* sp. nov., a Novel Intestinal Spirochete That Is Pathogenic to Pigs. *Journal of Clinical*  
599 *Microbiology* 2016;54:2942-9.
- 600 [45] La Scola B, Raoult D. Molecular identification of *Gemella* species from three patients with endocarditis. *J*  
601 *Clin Microbiol* 1998;36:866-71.
- 602 [46] Marini RP, Muthupalani S, Shen Z, Buckley EM, Alvarado C, Taylor NS, et al. Persistent infection of  
603 rhesus monkeys with '*Helicobacter macacae*' and its isolation from an animal with intestinal adenocarcinoma. *J*  
604 *Med Microbiol* 2010;59:961-9.
- 605 [47] Lynch SV, Wood RA, Boushey H, Bacharier LB, Bloomberg GR, Kattan M, et al. Effects of early-life  
606 exposure to allergens and bacteria on recurrent wheeze and atopy in urban children. *J Allergy Clin Immunol*  
607 2014;134:593-601 e12.

- 608 [48] Reynolds LA, Finlay BB. Early life factors that affect allergy development. *Nature Reviews Immunology*  
609 2017;17:518-28.
- 610 [49] Xie N, Cui Y, Yin YN, Zhao X, Yang JW, Wang ZG, et al. Effects of two *Lactobacillus* strains on lipid  
611 metabolism and intestinal microflora in rats fed a high-cholesterol diet. *BMC Complement Altern Med*  
612 2011;11:53.
- 613 [50] Gueimonde M, Laitinen K, Salminen S, Isolauri E. Breast milk: a source of bifidobacteria for infant gut  
614 development and maturation? *Neonatology* 2007;92:64-6.
- 615 [51] Freier TA, Beitz DC, Li L, Hartman PA. Characterization of *Eubacterium coprostanoligenes* sp. nov., a  
616 cholesterol-reducing anaerobe. *Int J Syst Bacteriol* 1994;44:137-42.
- 617 [52] Vojinovic D, Radjabzadeh D, Kurilshikov A, Amin N, Wijmenga C, Franke L, et al. Relationship between  
618 gut microbiota and circulating metabolites in population-based cohorts. *Nat Commun* 2019;10:5813.
- 619 [53] Henning SM, Yang J, Woo SL, Lee RP, Huang J, Rasmussen A, et al. Hass Avocado Inclusion in a  
620 Weight-Loss Diet Supported Weight Loss and Altered Gut Microbiota: A 12-Week Randomized,  
621 Parallel-Controlled Trial. *Curr Dev Nutr* 2019;3:nzz068.
- 622 [54] Sun L, Jia H, Li J, Yu M, Yang Y, Tian D, et al. Cecal Gut Microbiota and Metabolites Might Contribute to  
623 the Severity of Acute Myocardial Ischemia by Impacting the Intestinal Permeability, Oxidative Stress, and  
624 Energy Metabolism. *Front Microbiol* 2019;10:1745.
- 625 [55] Mancabelli L, Milani C, Lugli GA, Turrone F, Cocconi D, van Sinderen D, et al. Identification of universal  
626 gut microbial biomarkers of common human intestinal diseases by meta-analysis. *FEMS Microbiol Ecol*  
627 2017;93.
- 628 [56] Ochman H, Worobey M, Kuo CH, Ndjango JB, Peeters M, Hahn BH, et al. Evolutionary relationships of  
629 wild hominids recapitulated by gut microbial communities. *PLoS Biol* 2010;8:e1000546.
- 630 [57] National Research Council (U.S.). Committee for the Update of the Guide for the Care and Use of  
631 Laboratory Animals., Institute for Laboratory Animal Research (U.S.), National Academies Press (U.S.) (2011),  
632 'Guide for the care and use of laboratory animals', National Academies Press., Washington, D.C., pp. xxv, 220 p.
- 633 [58] Bolyen E, Rideout JR, Dillon MR, Bokulich NA, Abnet CC, Al-Ghalith GA, et al. Reproducible, interactive,  
634 scalable and extensible microbiome data science using QIIME 2. *Nat Biotechnol* 2019;37:852-7.
- 635 [59] Parks DH, Tyson GW, Hugenholtz P, Beiko RG. STAMP: statistical analysis of taxonomic and functional



636 profiles. *Bioinformatics* 2014;30:3123-4.

637 [60] Segata N, Izard J, Waldron L, Gevers D, Miropolsky L, Garrett WS, et al. Metagenomic biomarker  
638 discovery and explanation. *Genome Biol* 2011;12:R60.

639 [61] Friedman J, Alm EJ. Inferring Correlation Networks from Genomic Survey Data. *PLOS Computational*  
640 *Biology* 2012;8:11.

641 [62] Azuaje FJ. Selecting biologically informative genes in co-expression networks with a centrality score.  
642 *Biology Direct* 2014;9:12.

643 [63] Shannon P, Markiel A, Ozier O, Baliga NS, Wang JT, Ramage D, et al. Cytoscape: a software environment  
644 for integrated models of biomolecular interaction networks. *Genome Res* 2003;13:2498-504.

645 [64] Chin C-H, Chen S-H, Wu H-H, Ho C-W, Ko M-T, Lin C-Y. cytoHubba: identifying hub objects and  
646 sub-networks from complex interactome. *BMC Systems Biology* 2014;8:S11.

647 [65] Kuntal BK, Chandrakar P, Sadhu S, Mande SS. 'NetShift': a methodology for understanding 'driver  
648 microbes' from healthy and disease microbiome datasets. *The ISME Journal* 2019;13:442-54.

649 [66] Langille MGI, Zaneveld J, Caporaso JG, McDonald D, Knights D, Reyes JA, et al. Predictive functional  
650 profiling of microbial communities using 16S rRNA marker gene sequences. *Nature Biotechnology*  
651 2013;31:814-21.

652

653

654 **Figure legend**

655 **Figure 1.** Firmicutes to Bacteroidetes ratio and beta diversity in gut microbiota in different  
656 age groups of captive crab-eating macaques. **(a)** Composition of gut microbiota at the phylum  
657 level in the age four groups. **(b)** The relative proportion of Firmicutes to Bacteroidetes (F/B)  
658 ratio. **(c)** PCoA plot based on the Bray-Curtis distance matrix of all fecal samples. **(d)** Venn  
659 plot illustrating overlap of gut microbial genera among age groups. Genera detected in more  
660 than 6 fecal samples are included. **(e)** PCoA analysis of all fecal samples based on taxonomic  
661 profiles. **(f)** Unweighted Unifrac distance of gut microbiota between the three adult groups  
662 and the infant group. Pairwise *P*-values are calculated using nonparametric Kruskal-Wallis  
663 test with Tukey post-hoc test. IF, infants; YA, young adults; MA, the middle-aged; EL, the  
664 elderly. \*:  $P < 0.05$ ; \*\*:  $P < 0.01$ ; \*\*\*:  $P < 0.001$ .

665 **Figure 2. The most abundant genera of gut microbiota in different age groups.** **(a)**  
666 Heatmap showing the most abundant genera in gut microbiota of the four age groups. **(b)** Box  
667 plots showing ranking of top 20 abundant genera in infants, young adults, the middle-aged  
668 and elderly. **(c)** Venn plot illustrating overlap of top 20 abundant genera among age groups.  
669 Single letters in front of genus names indicate the phylum which the genera belong to: B,  
670 *Bacteroidetes*; F, *Firmicutes*; E, *Epsilonbacteraeota*; P, *Proteobacteria*; S, *Spirochaetes*. IF,  
671 infants; YA, young adults; MA, the middle-aged; EL, the elderly.

672 **Figure 3. Correlation between differentially abundant gut microbes and age.** Alluvial  
673 plots illustrating age-dependent phylogenetic shifts of the top 10 differentially abundant taxa  
674 at the phylum **(a)**, class **(b)**, order **(c)**, family **(d)** and genus levels **(e)**. Differentially abundant  
675 taxa are ranked by their median of abundance. Heatmaps showing significant age correlations  
676 for differentially abundant phyla **(f)** and genera **(g)** with FDR  $< 0.05$ . *P*-values are derived  
677 from Spearman correlation test. For genera, only the top 40 genera ranked by  $|r|$  are shown.

678 **Figure 4. Differentially abundant taxa enriched in the four age groups from LefSe**  
679 **analysis.** **(a)** Phylogenetic cladogram showing differentially abundant taxa from kingdom to  
680 family levels. Microbial classes are indicated with letters. Bar charts showing differentially  
681 abundant taxa in the family **(b)** and genus levels **(c)** with average abundance  $> 0.1\%$ .

682 **Figure 5. The interactive networks of gut microbiota.** Microbial interactive networks in  
683 infants (**a**), young adults (**b**), the middle-aged (**c**), the elderly (EL, **d**) and all samples (**e**) are  
684 constructed from SparCC results, and visualized using Cytoscape. Genera with average  
685 abundance  $> 0.1\%$ , correlation  $|r| > 0.2$  and  $P < 0.05$  are included in the networks. Node  
686 colors denote the phylum of the genera. Node sizes represent weighted node connectivity.  
687 Edge colors and thickness represent correlation  $r$ . IF, infants; YA, young adults; MA, the  
688 middle-aged; EL, the elderly.

689 **Figure 6. Topological analysis identifies hub and driver genera in the microbiota**  
690 **SparCC networks.** (a) MCC scores from the whole network and top 10 hub genera in the  
691 SparCC networks. (b) Venn plot showing the overlap of hub genera in the four ages groups.  
692 Genera are colored blue if negatively associated with age, and red if positively associated  
693 with age. (c) NetShift common sub-networks based on the SparCC networks with highlighted  
694 driver genera. Node sizes are in proportion to their NESH scores, and potential drivers are  
695 highlighted red. Edges present only in case are colored red, green only in control, and blue in  
696 both. Node names without underlines denote age-associated genera.

697 **Figure 7. Age-associated gut microbial phenotypes and functional profiles.** (a)  
698 Comparison of gut microbial phenotypes predicted by BugBase among the four age groups.  
699  $P$ -values for group comparisons are derived from nonparametric Kruskal-Wallis test with  
700 Tukey post-hoc test. (b) PCA plot based on microbial function profiles predicted by PICRUSt.  
701 (c) Heatmap illustrating median abundance and age correlation of gut microbial functions  
702 related to metabolism of carbohydrates, lipids and proteins as well as host immune response.  
703  $P$ -values are derived from Spearman correlation test. KEGG pathways with FDR  $< 0.05$  are  
704 shown. (d) LefSe results of gut microbial functions enriched in each of the four age groups. \*:  
705  $P < 0.05$ ; \*\*:  $P < 0.01$ ; \*\*\*:  $P < 0.001$ .

# Figure 1

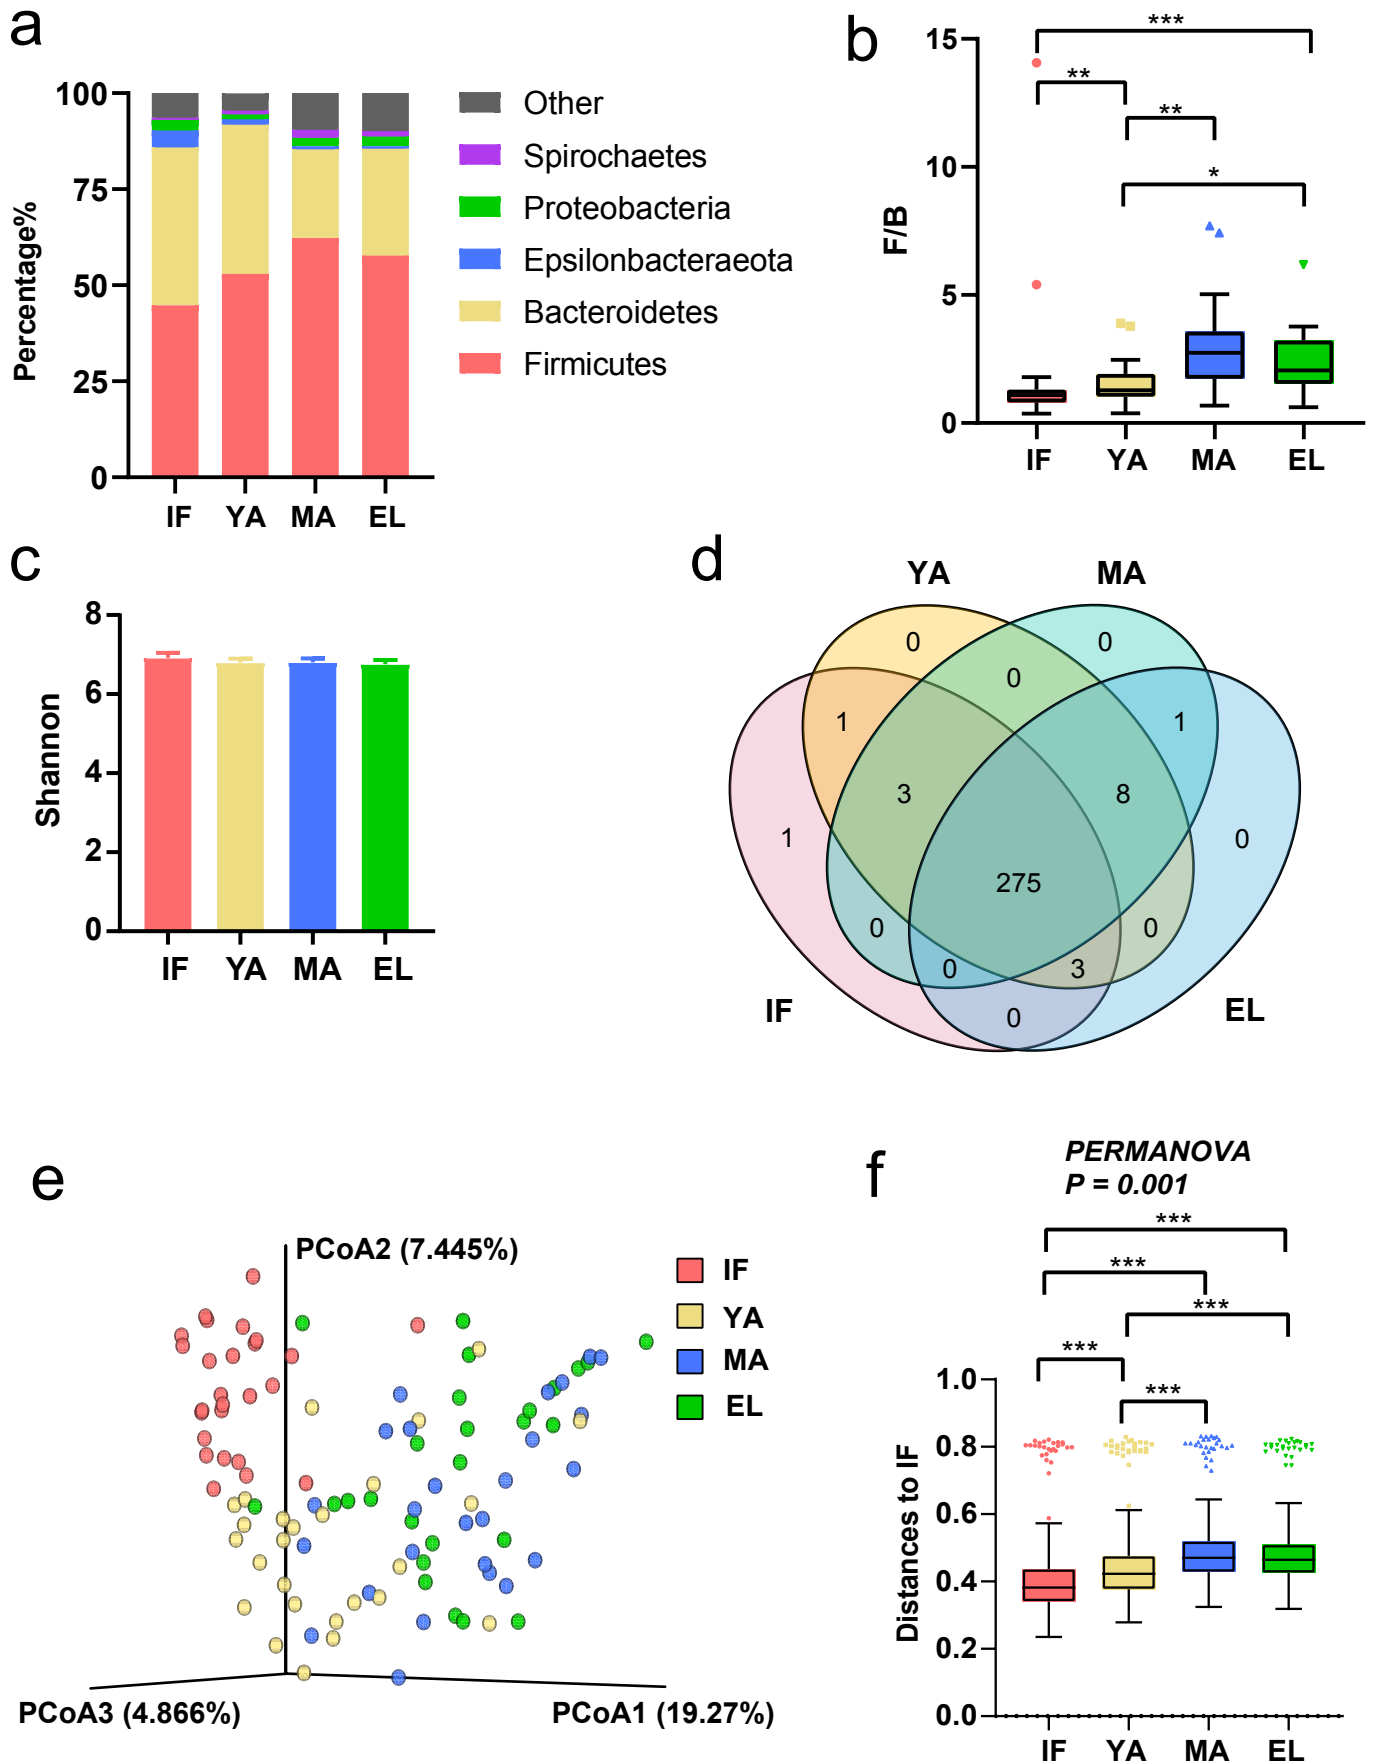

# Figure 2

bioRxiv preprint doi: <https://doi.org/10.1101/2020.03.30.015305>; this version posted March 31, 2020. The copyright holder for this preprint (which was not certified by peer review) is the author/funder, who has granted bioRxiv a license to display the preprint in perpetuity. It is made available under aCC-BY-NC-ND 4.0 International license.

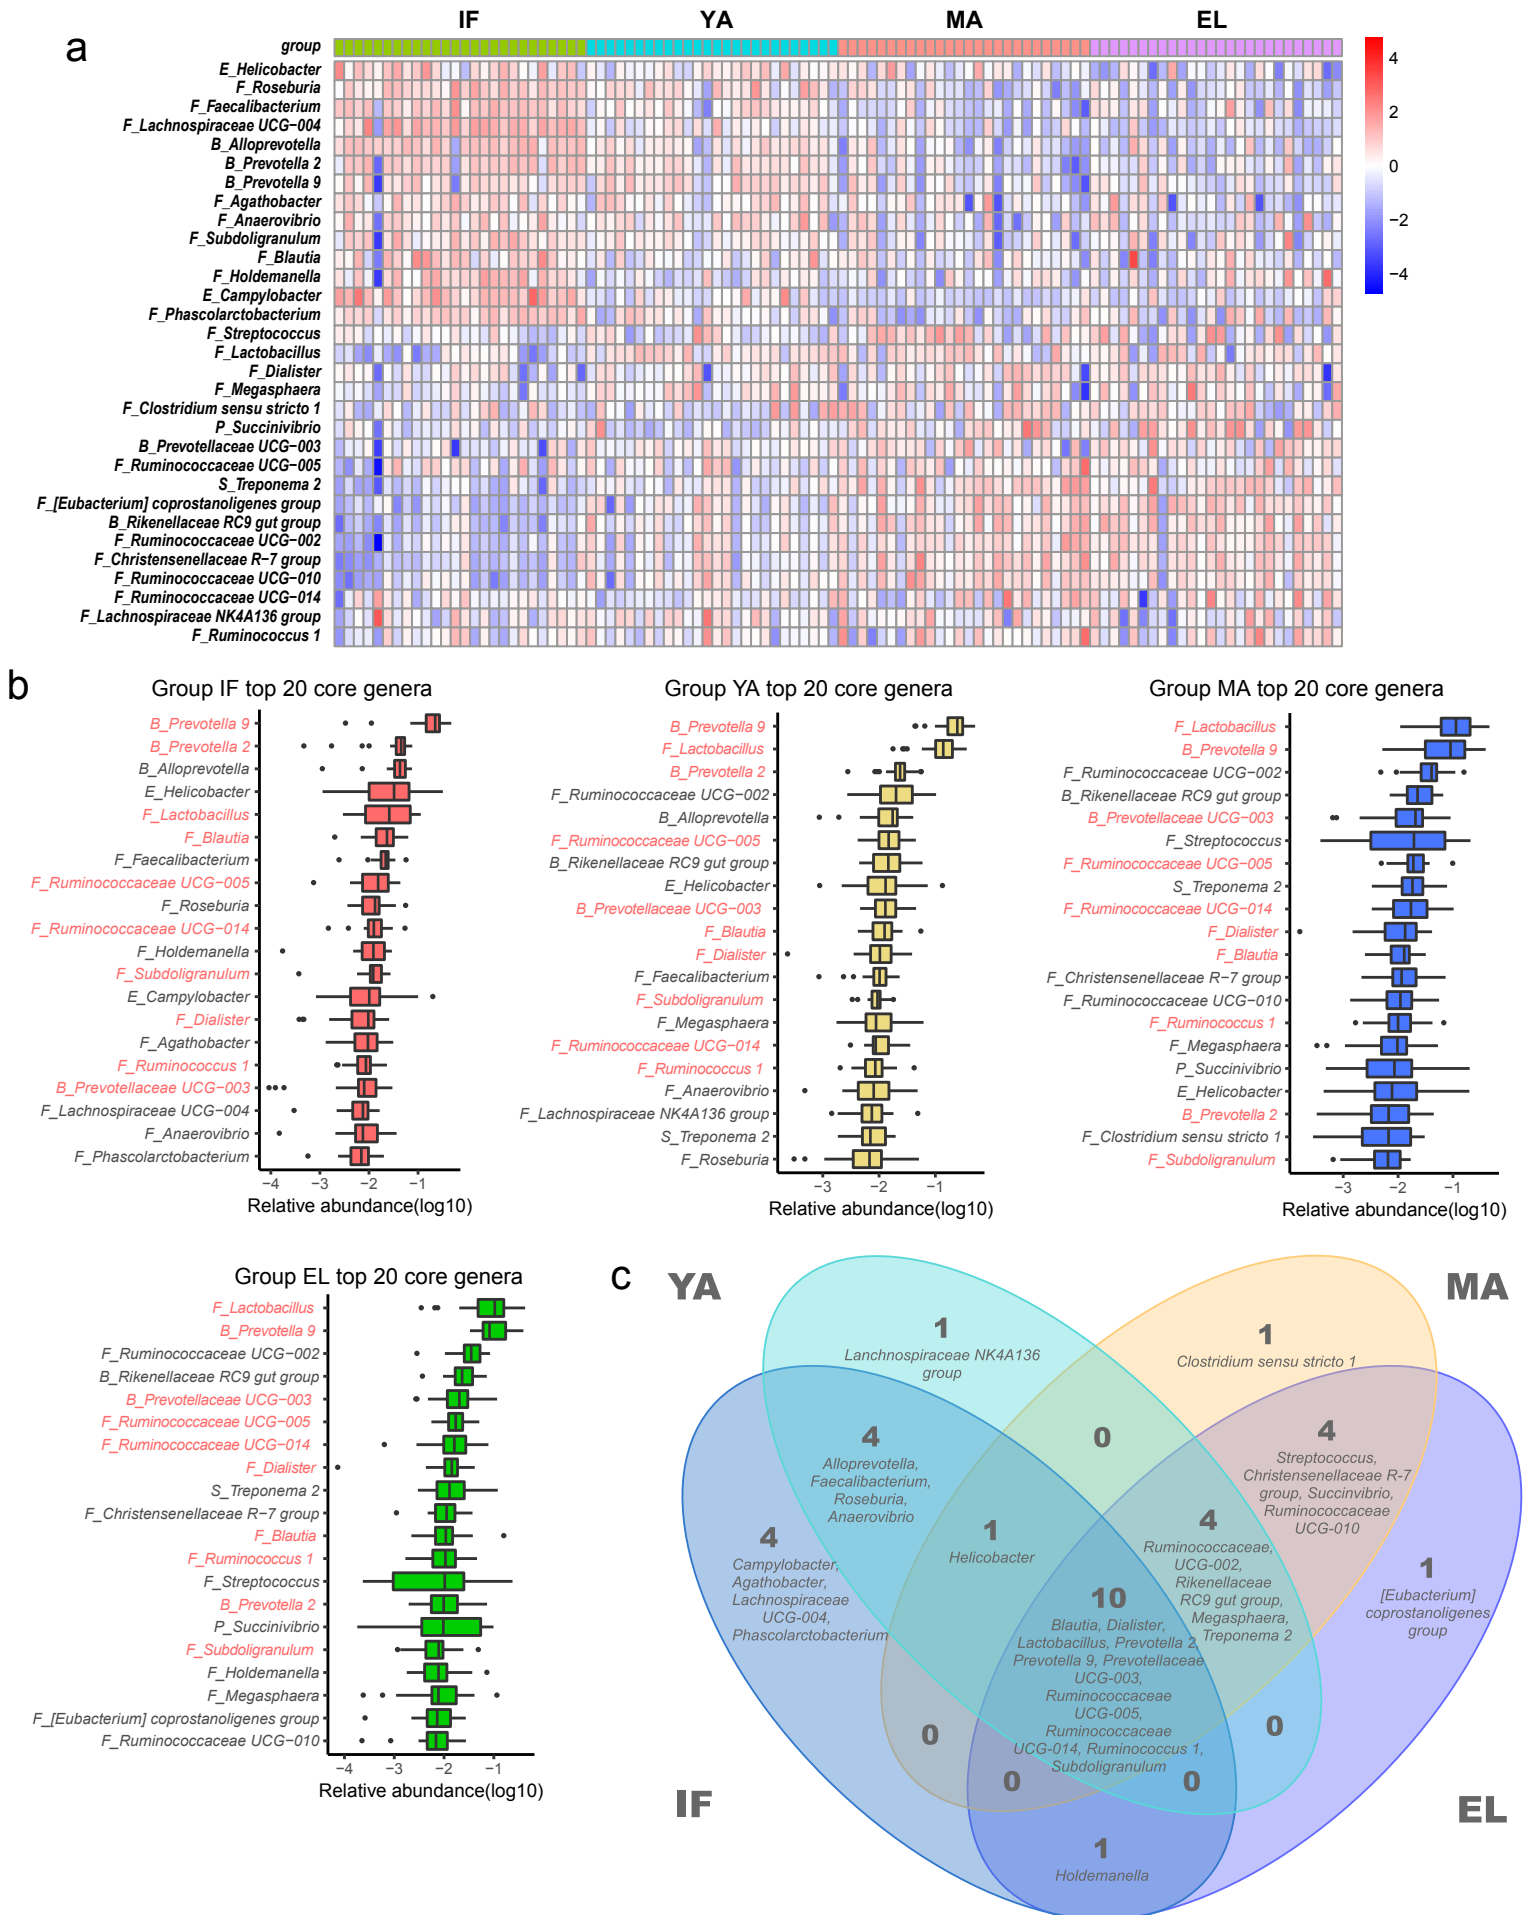

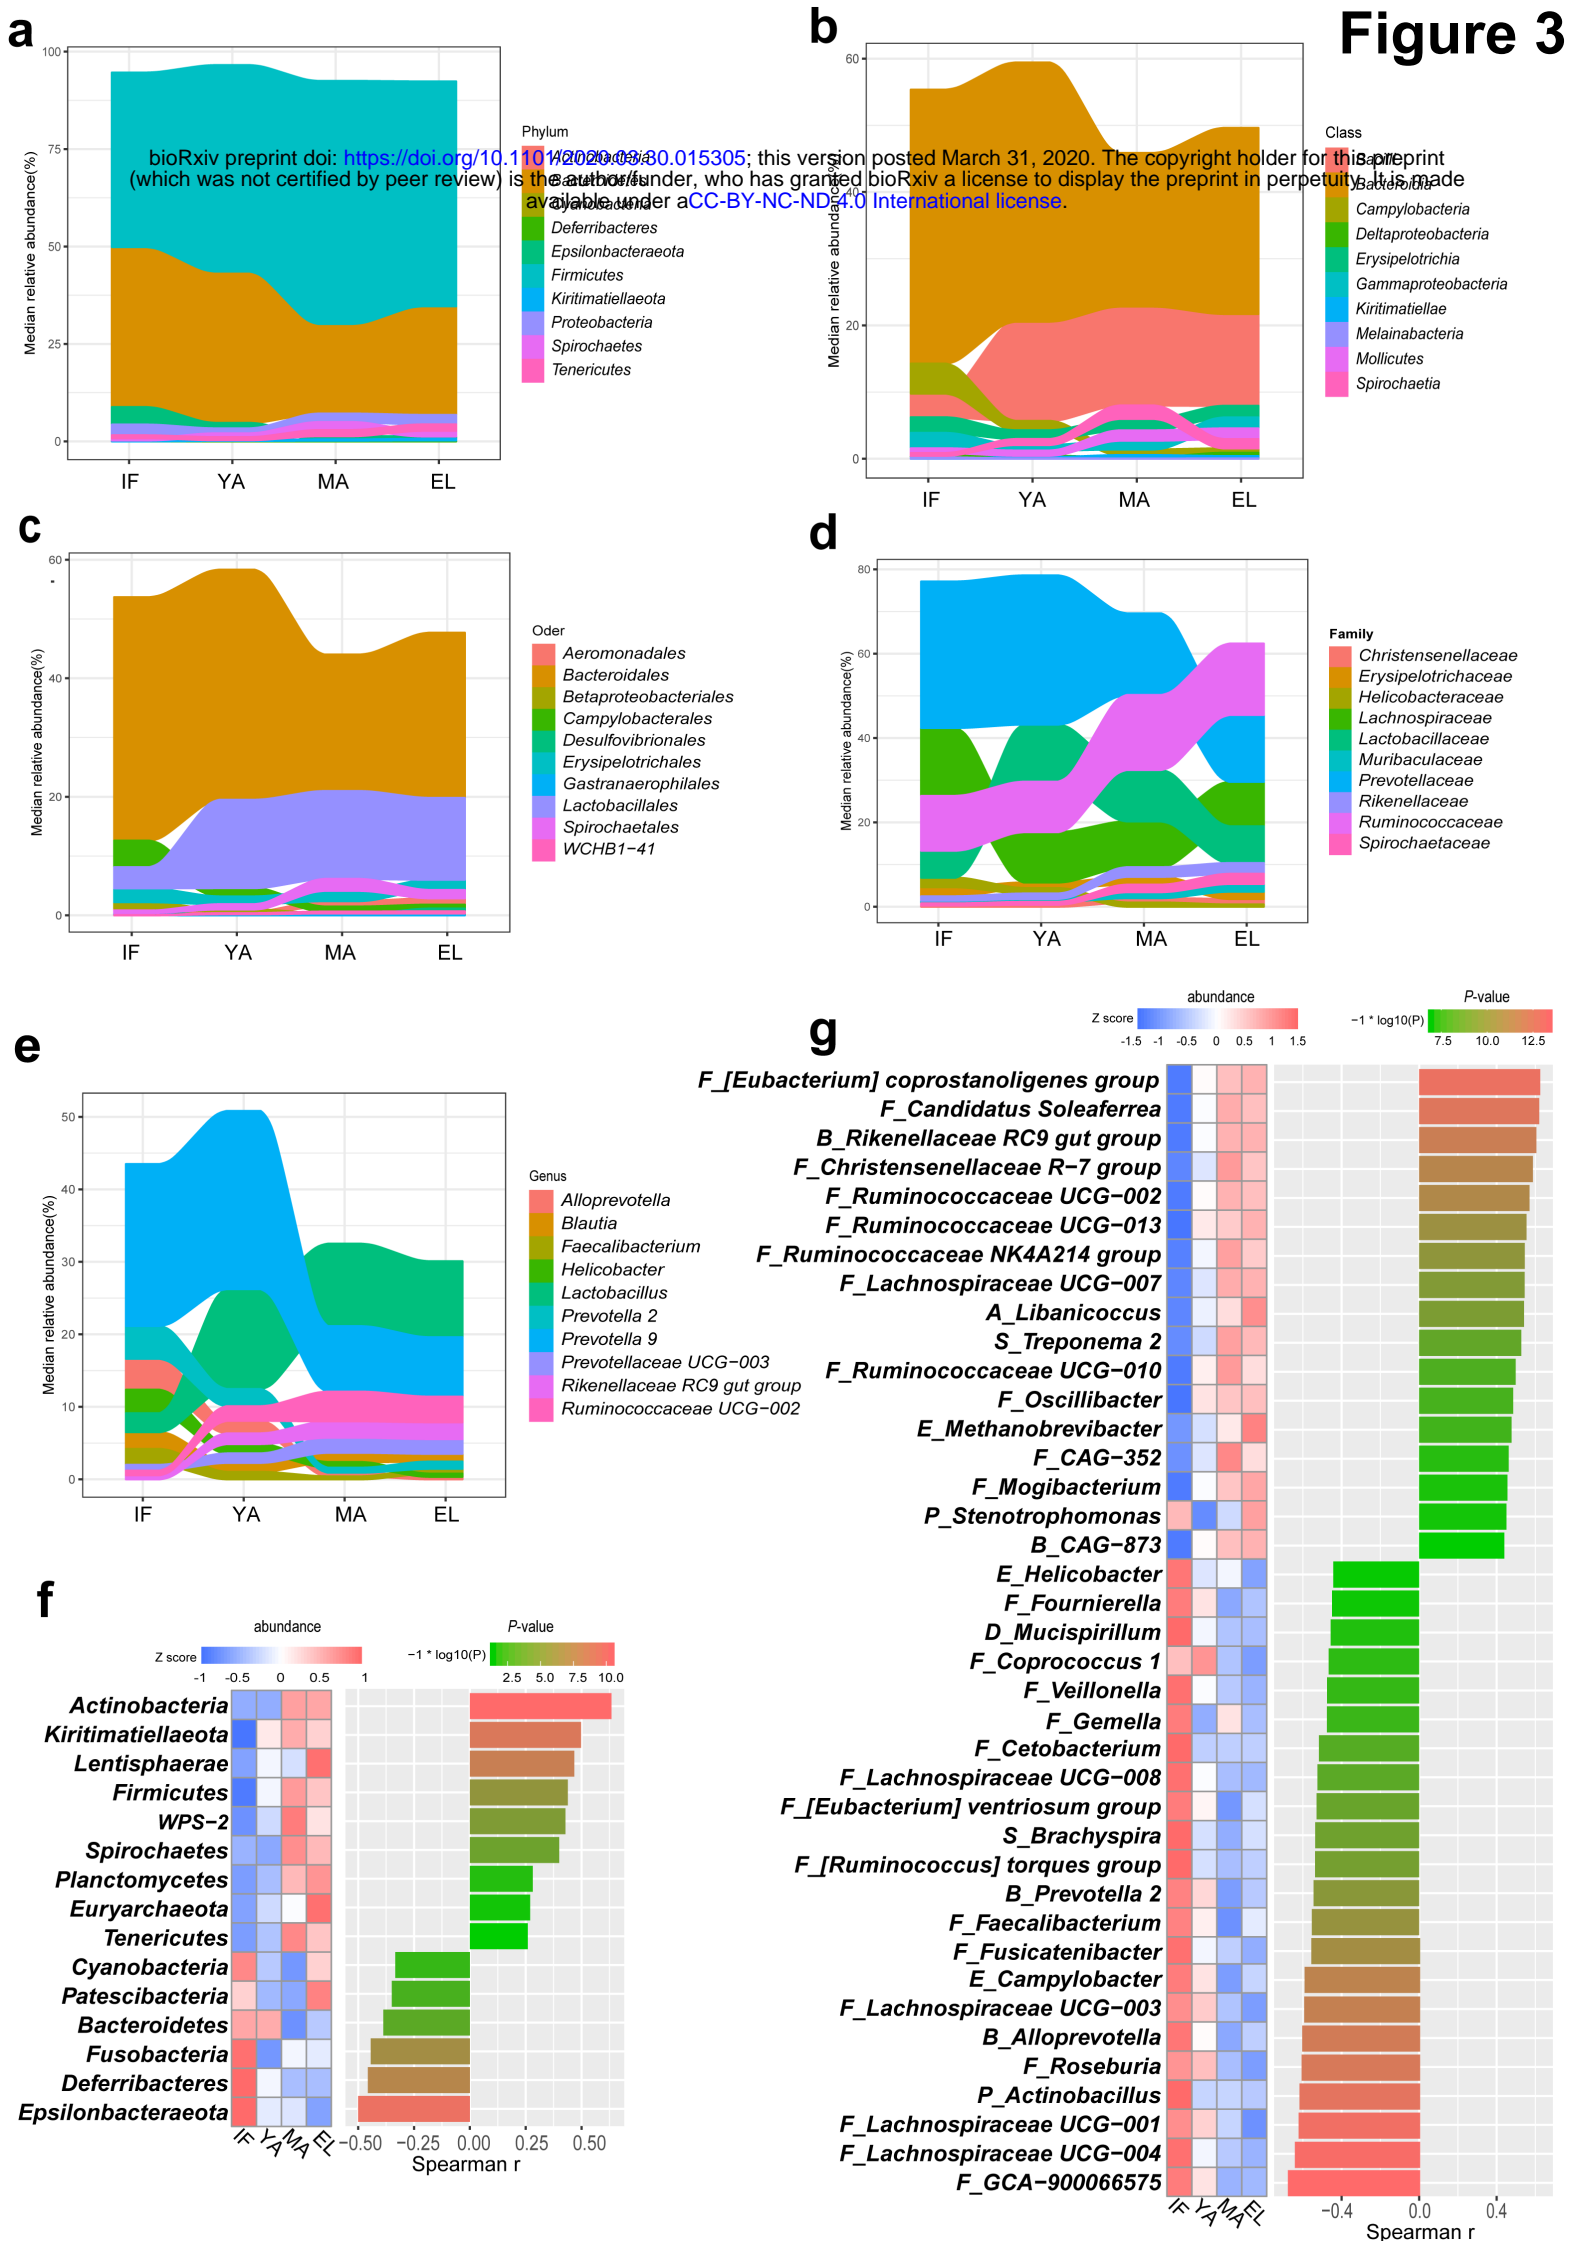

# Figure 4

**a**

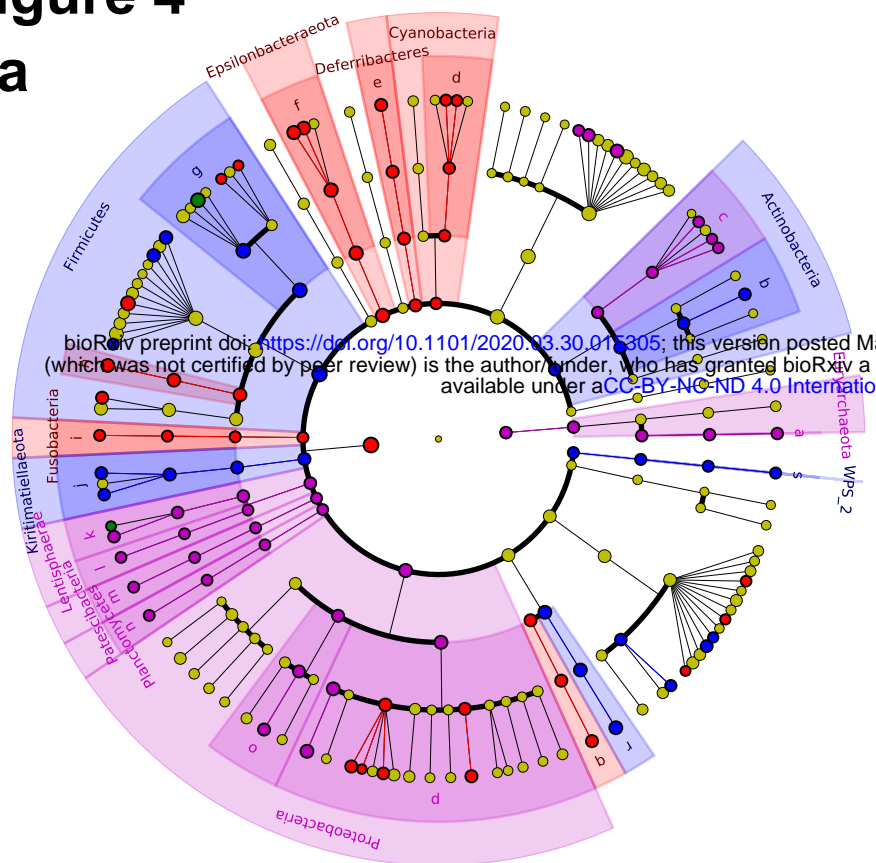

IF YA MA EL

k: Lentisphaeria  
 l: Oligosphaeria  
 m: Saccharimonadia  
 n: Planctomycetacia  
 o: Deltaproteobacteria  
 p: Gammaproteobacteria  
 q: Brachyspirae  
 r: Spirochaetia  
 s: unculturedrumenbacterium

**b**

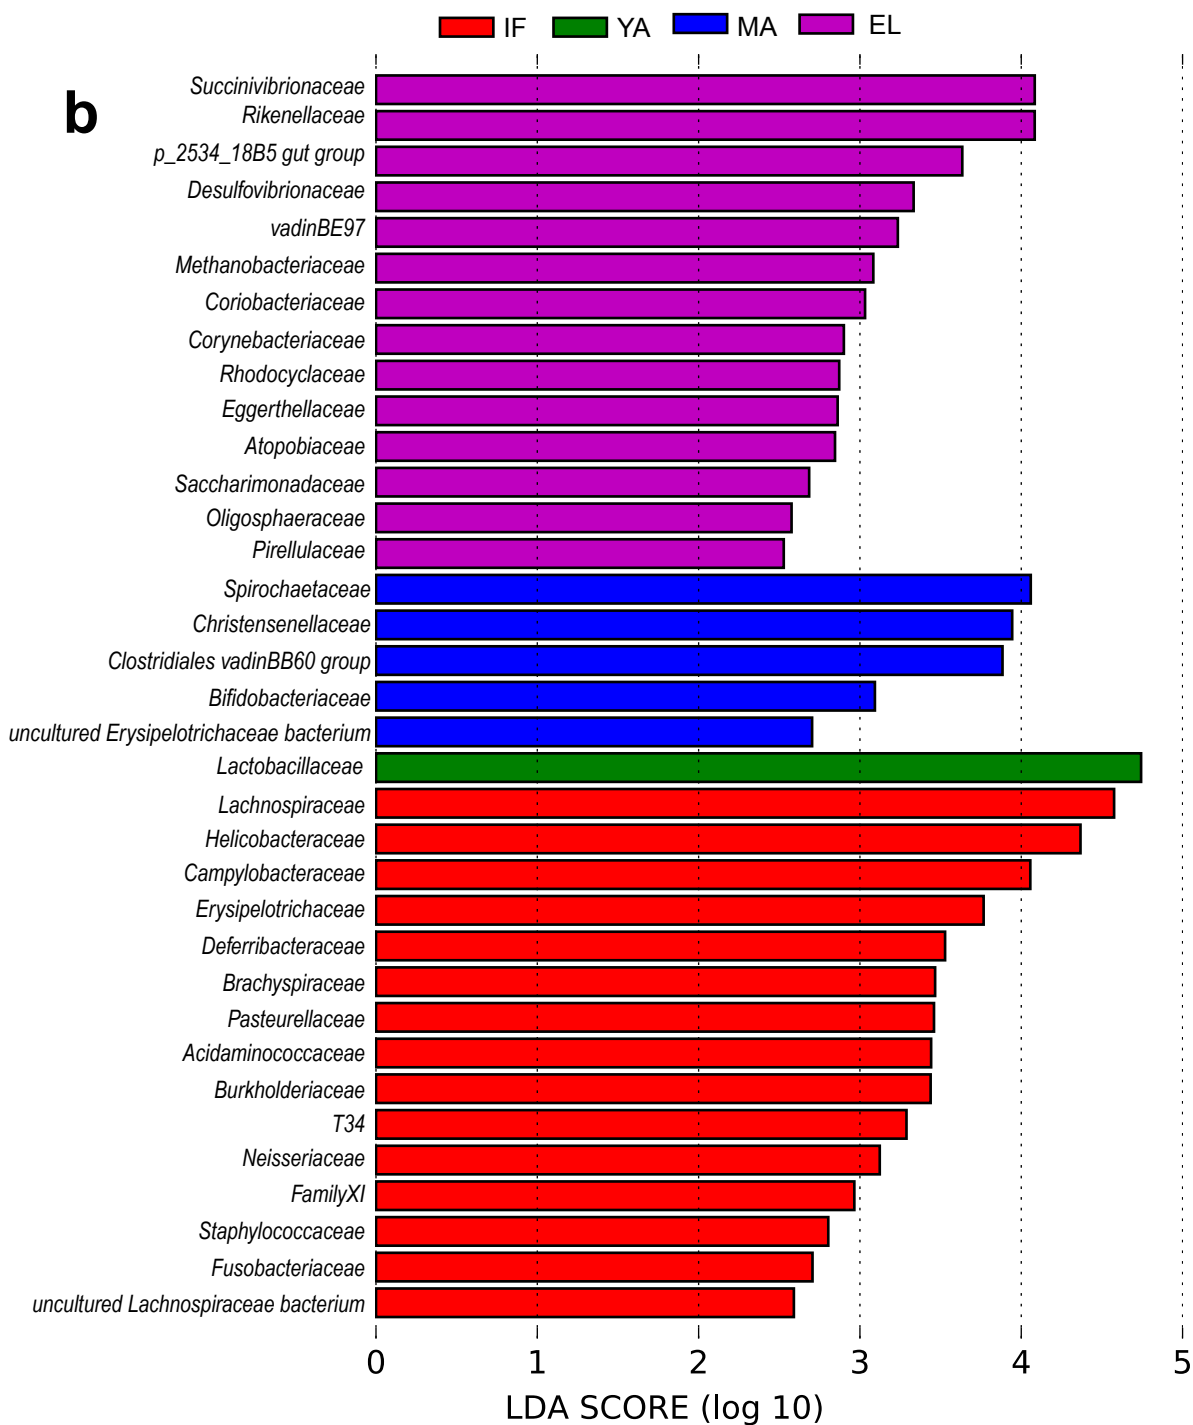

**c**

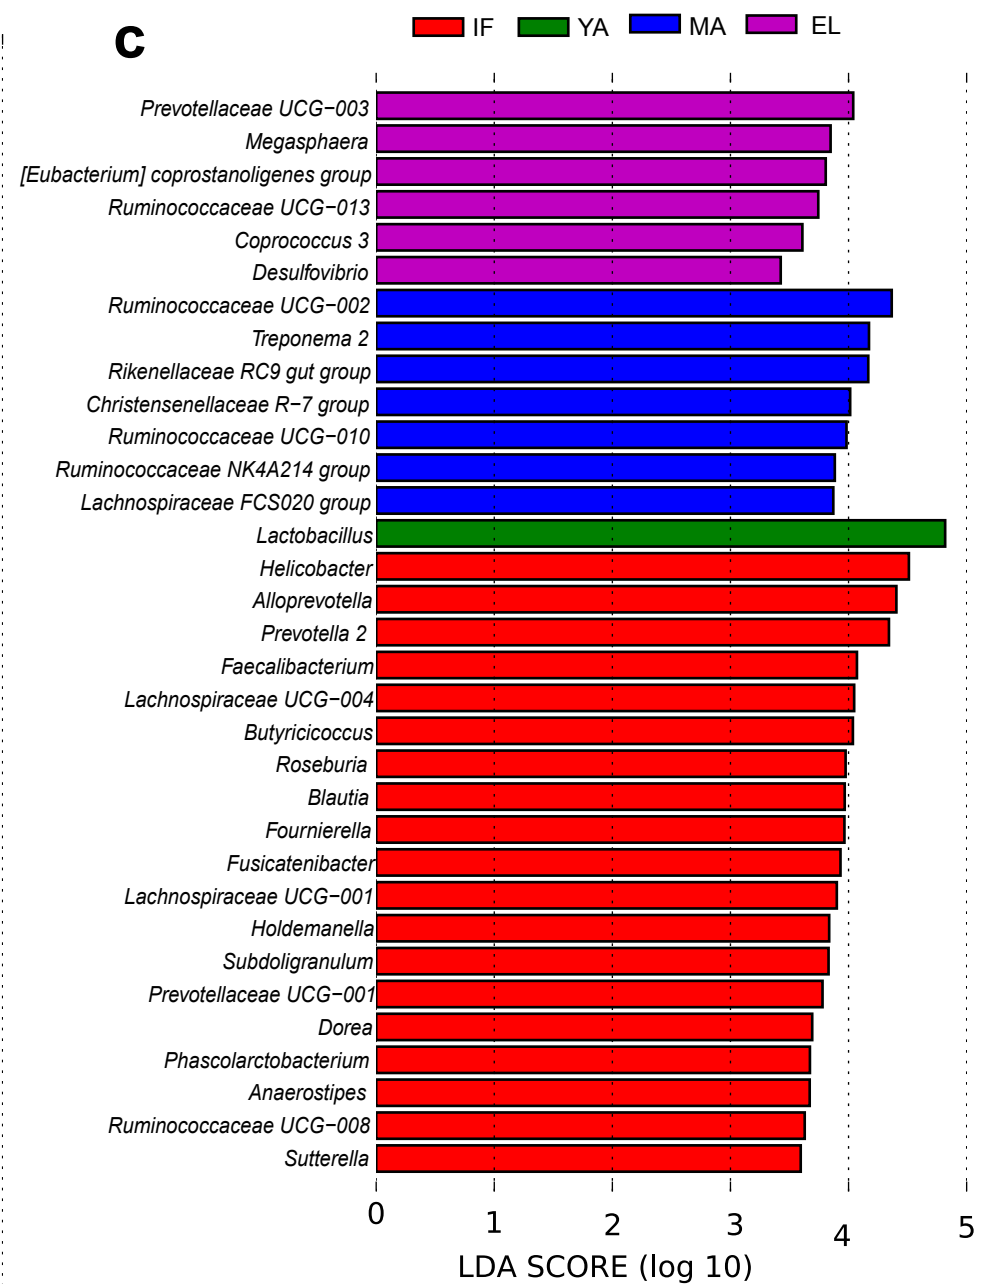

LDA SCORE (log 10)

# Figure 5

bioRxiv preprint doi: <https://doi.org/10.1101/2020.03.30.015305>; this version posted March 31, 2020. The copyright holder for this preprint (which was not certified by peer review) is the author/funder, who has granted bioRxiv a license to display the preprint in perpetuity. It is made available under a [CC-BY-NC-ND 4.0 International license](https://creativecommons.org/licenses/by-nc-nd/4.0/).

**a**

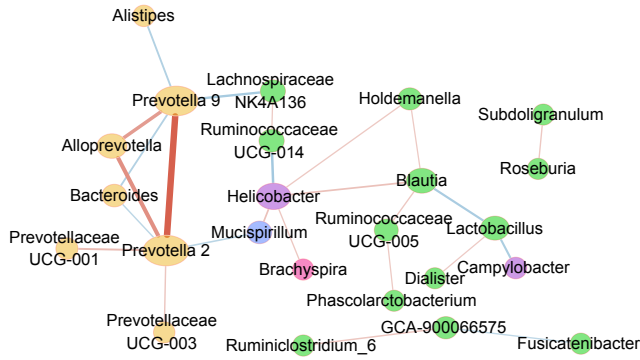

**b**

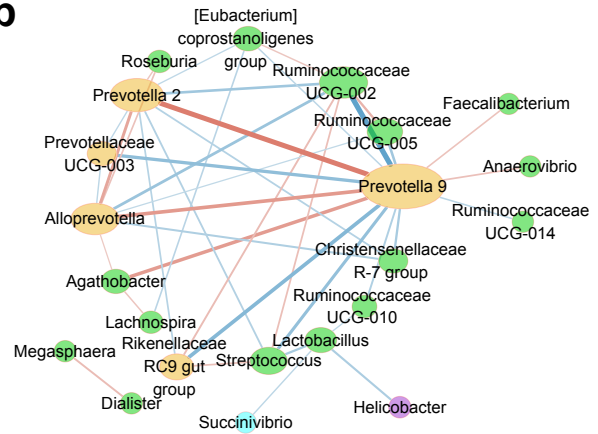

**c**

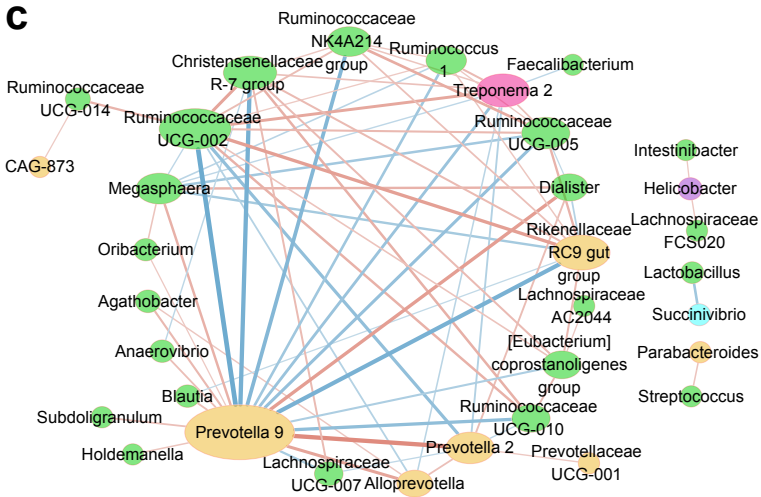

**d**

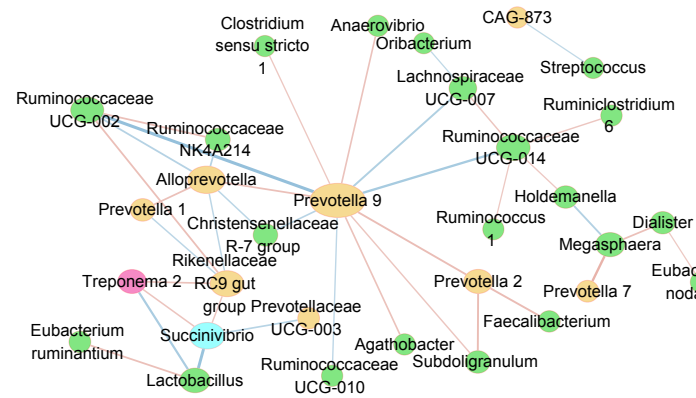

**e**

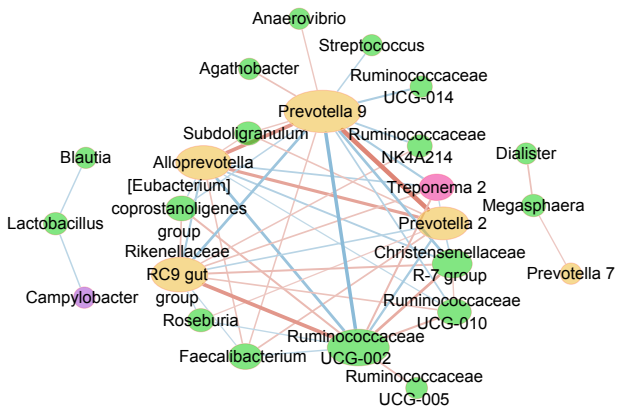

■ Bacteroidetes    ■ Firmicutes    ■ Epsilonbacteraota  
■ Deferribacteres    ■ Spirochaetes    ■ Proteobacteria



# Figure 6

**a**

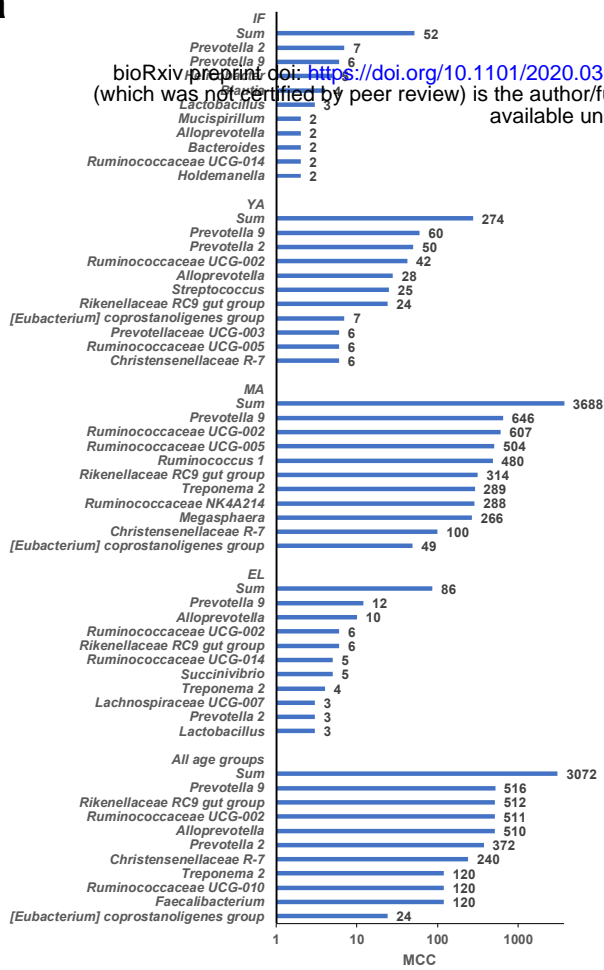

**b**

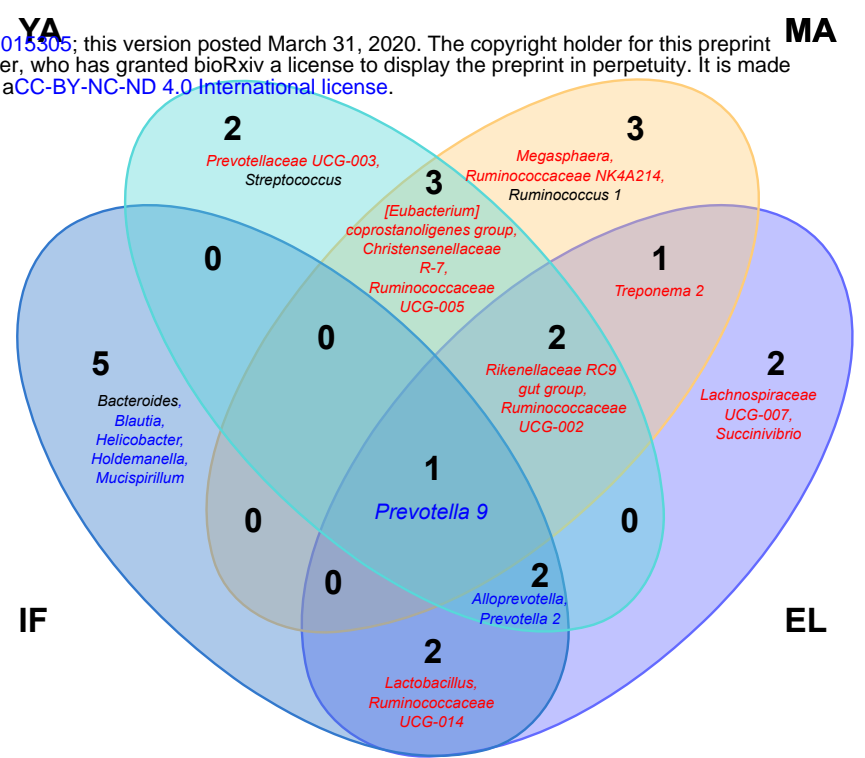

**c**

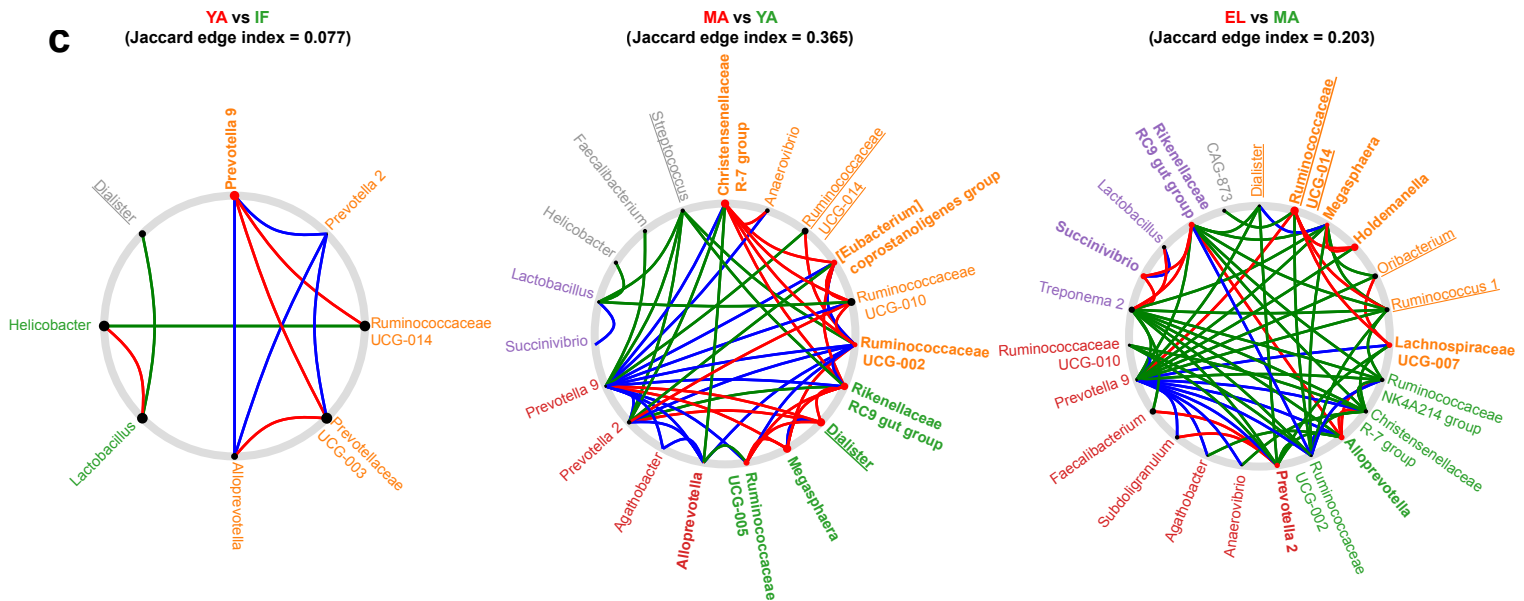

# Figure 7

**a**

bioRxiv preprint doi: <https://doi.org/10.1101/2020.03.30.015905>; this version posted March 31, 2020. The copyright holder for this preprint (which was not certified by peer review) is the author/funder, who has granted bioRxiv a license to display the preprint in perpetuity. It is made available under aCC-BY-NC-ND 4.0 International license.

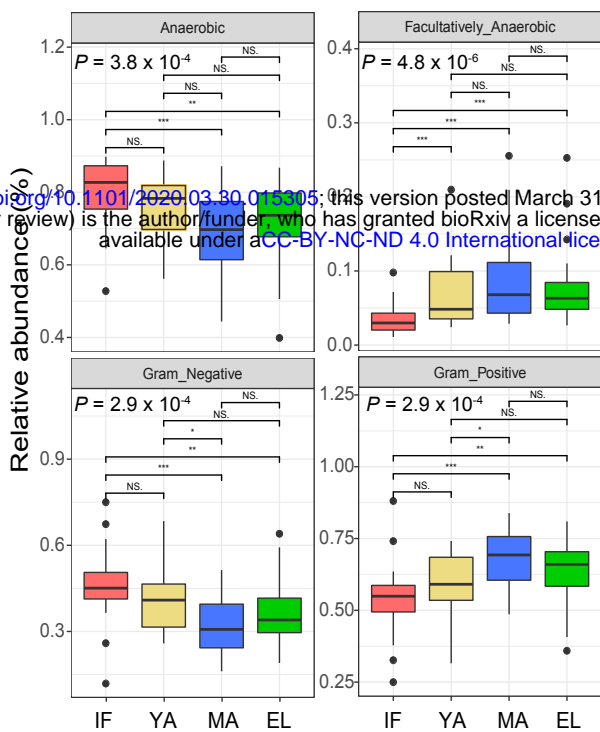

**b**

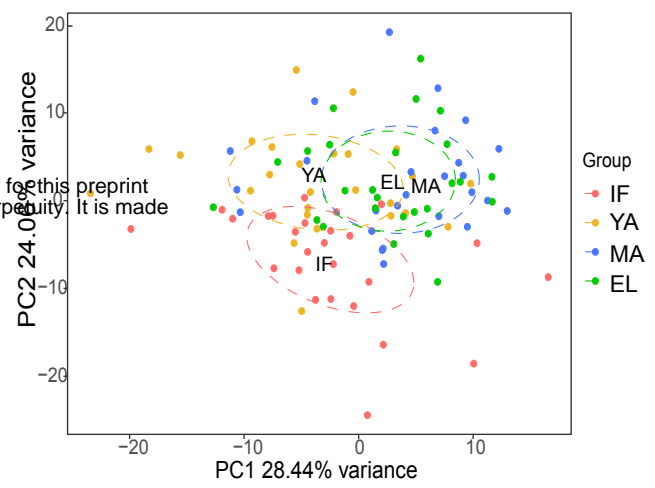

**c**

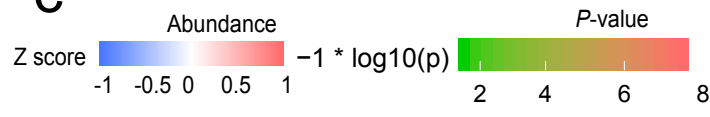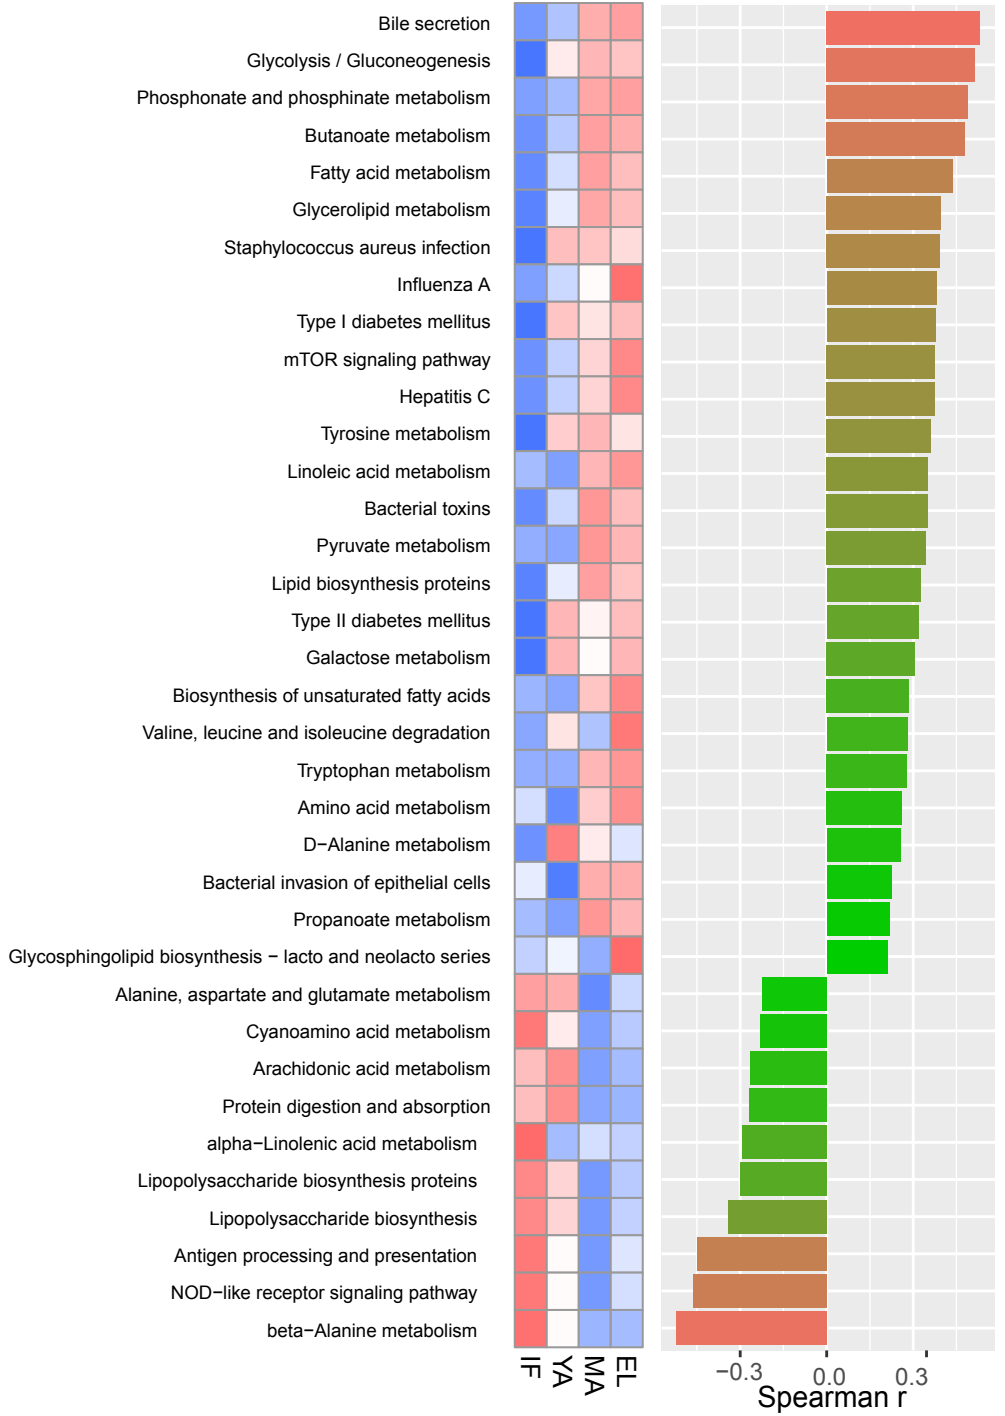

**d**

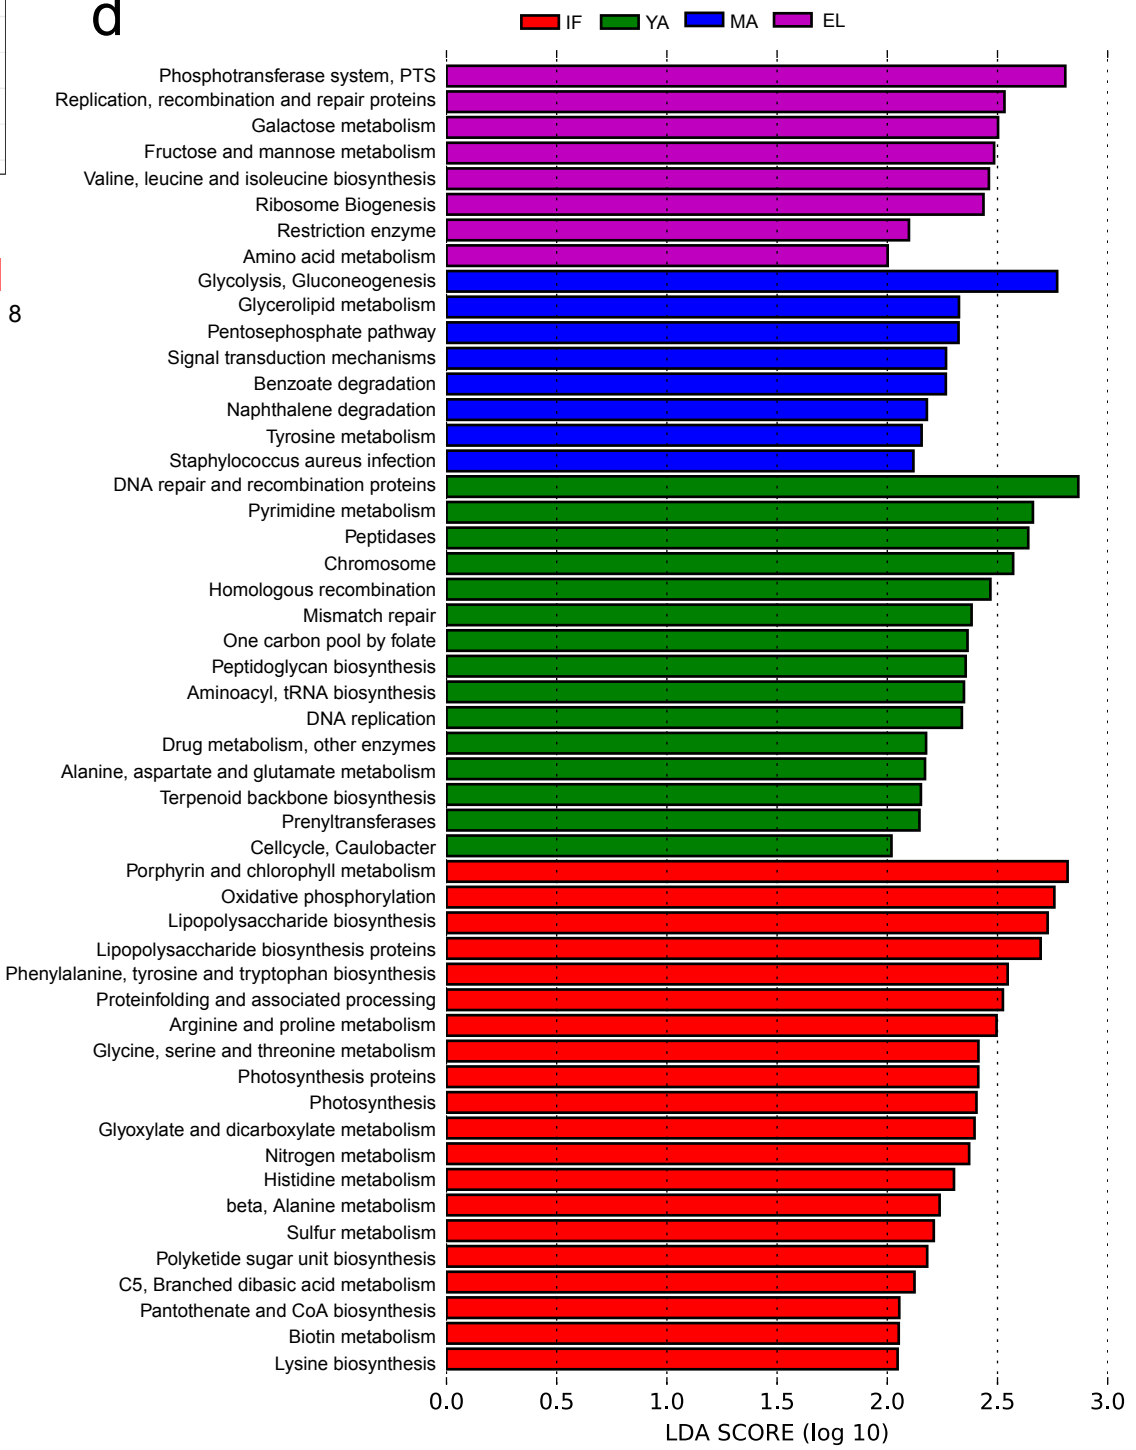

Source: https://www.biorxiv.org/content/10.1101/2020.03.30.015305v1.full.pdf
